# Supplementary material for: ‘To be a woman is to make a plan’: a qualitative study exploring mothers’ experiences of the Child Support Grant in supporting children’s diets and nutrition in South Africa
Source: PubMed Central journal article supplement — BMJ Open. 2018 Apr 24;8(4):e019376. doi: 10.1136/bmjopen-2017-019376 (PMC5922468; doi:10.1136/bmjopen-2017-019376), 2018-04-24
Supplement: bmjopen-2017-019376.draft_revisions.pdf [file bmjopen-2017-019376.draft_revisions.pdf]

# BMJ Open

BMJ Open is committed to open peer review. As part of this commitment we make the peer review history of every article we publish publicly available.

When an article is published we post the peer reviewers' comments and the authors' responses online. We also post the versions of the paper that were used during peer review. These are the versions that the peer review comments apply to.

The versions of the paper that follow are the versions that were submitted during the peer review process. They are not the versions of record or the final published versions. They should not be cited or distributed as the published version of this manuscript.

BMJ Open is an open access journal and the full, final, typeset and author-corrected version of record of the manuscript is available on our site with no access controls, subscription charges or pay-per-view fees (<http://bmjopen.bmj.com>).

If you have any questions on BMJ Open's open peer review process please email [info.bmjopen@bmj.com](mailto:info.bmjopen@bmj.com)

# BMJ Open

## **“To be a woman is to make a plan”: Mothers’ experiences of the Child Support Grant in supporting children’s diets and nutrition in South Africa**

|                                 |                                                                                                                                                                                                                                                                                                                                                                                                                                                                                                                                                                                                                                                                                                                                                                                                                                                                                                      |
|---------------------------------|------------------------------------------------------------------------------------------------------------------------------------------------------------------------------------------------------------------------------------------------------------------------------------------------------------------------------------------------------------------------------------------------------------------------------------------------------------------------------------------------------------------------------------------------------------------------------------------------------------------------------------------------------------------------------------------------------------------------------------------------------------------------------------------------------------------------------------------------------------------------------------------------------|
| Journal:                        | <i>BMJ Open</i>                                                                                                                                                                                                                                                                                                                                                                                                                                                                                                                                                                                                                                                                                                                                                                                                                                                                                      |
| Manuscript ID                   | bmjopen-2017-019376                                                                                                                                                                                                                                                                                                                                                                                                                                                                                                                                                                                                                                                                                                                                                                                                                                                                                  |
| Article Type:                   | Research                                                                                                                                                                                                                                                                                                                                                                                                                                                                                                                                                                                                                                                                                                                                                                                                                                                                                             |
| Date Submitted by the Author:   | 10-Oct-2017                                                                                                                                                                                                                                                                                                                                                                                                                                                                                                                                                                                                                                                                                                                                                                                                                                                                                          |
| Complete List of Authors:       | Zembe-Mkabile, Wanga; Medical Research Council, Health Systems Research Unit; Southern African Social Policy Research Institute<br>Surrender, Rebecca; University of Oxford , Department of Social Policy and Intervention; Rhodes University, Institute of Social and Economic Research<br>Sanders, David; University of Western Cape, School of Public Health; University of Cape Town, Department of Paediatrics and Child Health, Faculty of Health Sciences<br>Swart, Rina; University of the Western Cape, Department of Dietetics and Nutrition<br>Ramokolo, Vundli; Medical Research Council, Health Systems Research Unit<br>Wright, Gemma ; Southern African Social Policy Research Institute; University of South Africa, Archie Mafeje Research Institute<br>Doherty, Tanya; Medical Research Council, Health Systems Research Unit; University of Western Cape, School of Public Health |
| <b>Primary Subject Heading</b>: | Nutrition and metabolism                                                                                                                                                                                                                                                                                                                                                                                                                                                                                                                                                                                                                                                                                                                                                                                                                                                                             |
| Secondary Subject Heading:      | Qualitative research, Nutrition and metabolism                                                                                                                                                                                                                                                                                                                                                                                                                                                                                                                                                                                                                                                                                                                                                                                                                                                       |
| Keywords:                       | cash transfers, food security, Community child health < PAEDIATRICS, child nutrition, south africa                                                                                                                                                                                                                                                                                                                                                                                                                                                                                                                                                                                                                                                                                                                                                                                                   |
|                                 |                                                                                                                                                                                                                                                                                                                                                                                                                                                                                                                                                                                                                                                                                                                                                                                                                                                                                                      |

SCHOLARONE™  
Manuscripts

1  
2  
3 **“To be a woman is to make a plan”: Mothers’ experiences of the Child Support Grant in**  
4 **supporting children’s diets and nutrition in South Africa**  
5  
6  
7

8  
9 **Wanga Zembe-Mkabile<sup>1,2</sup>, Rebecca Surender<sup>3,4</sup>, David Sanders<sup>5,6</sup>, Rina Swart<sup>5</sup>, Vundli**  
10 **Ramokolo<sup>1</sup>, Gemma Wright<sup>2,7</sup>, and Tanya Doherty<sup>1,5,8</sup>**  
11  
12

13 **Corresponding author:** Wanga Zembe-Mkabile

14 Address: Medical Research Council of South Africa

15 Francie van Zyl Dr

16 Parow Valley

17 Cape Town

18 7500

19 Email: wanga.zembe@mrc.ac.za; wanga.zembe@gtc.ox.ac.uk

20 Tel: 0027 21 938 0447/Fax: 0027 21 938 0483  
21  
22  
23

24  
25  
26  
27  
28 **Author affiliations and qualifications:**

29  
30  
31 1. Dr Wanga Zembe-Mkabile

32 Qualifications: MSc, DPhil Social Policy

33 Affiliations:

- 34  
35  
36 1. Health Systems Research Unit, South African Medical Research Council  
37 2. Southern African Social Policy Research Institute  
38

39 b. Prof Rebecca Surender

40 Qualifications: MSc; DPhil Sociology

41 Affiliation:

- 42  
43  
44 3. Department of Social Policy and Intervention, University of Oxford  
45 4. Institute of Social & Economic Research, Rhodes University  
46  
47  
48  
49

50  
51 c. Prof David Sanders

52 Qualifications: MD, MRCP, DSc

53 Affiliation:

- 54  
55  
56 5. School of Public Health, University of the Western Cape  
57  
58

- 1  
2  
3           6. Department of Paediatrics and Child Health, Faculty of Health Sciences, University of Cape  
4           Town

5  
6 e. Prof Rina Swart

7 Qualifications: MPhil (Public Health), PhD

8 Affiliation:

- 9  
10           5. Department of Dietetics and Nutrition, University of the Western Cape

11  
12 f. Ms Vundli Ramokolo

13 Qualifications: MPH

14 Affiliation:

- 15  
16           1. South African Medical Research Council

17  
18 g. Prof Gemma Wright

19 Qualifications: MPhil, DPhil Social Policy

20 Affiliation:

- 21           2. Southern African Social Policy Research Institute  
22           6. Archie Mafeje Research Institute, University of South Africa

23  
24 h. Prof Tanya Doherty

25 Qualifications: MPH, PhD Public Health

26 Affiliation:

- 27           1. Health Systems Research Unit, South African Medical Research Council  
28           5. School of Public Health, University of the Western Cape  
29           7. School of Public Health, University of Witwatersrand

30  
31 **Keywords:** child support grant, cash transfers; child wellbeing, food security, child nutrition

32  
33 **Acknowledgements**

34 This study was financially supported through the DST/NRF Centre of Excellence in Food Security. We  
35 thank the caregivers and their families for their contribution to this study. We also wish to thank  
36 Professor Stephen Devereux for reading the first draft of this manuscript and providing insightful  
37 comments that helped to strengthen it.

38  
39 **Contributorship Statement**

40 WZM, VR, TD, DS, RS, RS, GW conceptualised and designed the study. WZM and VR conducted the  
41 interviews. Data were coded and analysed by WZM, and the coding and analysis were checked by  
42 VR, TD, DS, RS, and RS. WZM wrote the first draft of the manuscript and thereafter all co-authors  
43 made inputs on all drafts of the manuscript.

1  
2  
3  
4  
5  
6  
7  
8  
9  
10  
11  
12  
13  
14  
15  
16  
17  
18  
19  
20  
21  
22  
23  
24  
25  
26  
27  
28  
29  
30  
31  
32  
33  
34  
35  
36  
37  
38  
39  
40  
41  
42  
43  
44  
45  
46  
47  
48  
49  
50  
51  
52  
53  
54  
55  
56  
57  
58  
59  
60

**Data Sharing Statement**

The study data comprises of audio recordings, transcripts, transcript summaries and coded analysis. The coded analysis can be made available to reviewers should they wish to access it. We are unable to make the audio recordings and transcripts available as we did not seek permission for this from participants at the start of the study when we collected data.

**Conflict of interest:** None to declare

For peer review only

## Abstract

**Background:** Food security and good nutrition are key determinants of child wellbeing. There is strong evidence that cash transfers such as South Africa's Child Support Grant (CSG) have the potential to help address some of the underlying drivers of food insecurity and malnutrition by providing income to caregivers in poor households, but it is unclear whether and how they work to affect child wellbeing and nutrition. We present results from a qualitative study conducted to explore the role of the CSG in food security and child wellbeing in poor households in an urban and a rural setting in South Africa.

**Design:** A qualitative study

**Setting:** Mt Frere, Eastern Cape (rural area); Langa, Western Cape (urban township).  
**Participants:** CSG recipient and non-recipient caregivers and community members in the two sites

**Methods:** We conducted a total of 40 in-depth interviews with mothers or primary caregivers in receipt of the CSG for children under the age of 5 years. In addition, 5 focus group discussions with approximately 8 members per group were conducted. Data were analysed using manifest and latent thematic content analysis methods.

**Results:** The CSG is too small on its own to improve child nutrition and wellbeing. Providing for children's diets and nutrition competes with other priorities that are equally important for child wellbeing and nutrition.

**Conclusion:** In addition to raising the value of the CSG so that it is linked to the cost of a nutritious basket of food, more emphasis should be placed on parallel structural solutions that are vital for good child nutrition outcomes and wellbeing, such as access to free quality early child development services that provide adequate nutritious meals, access to adequate basic services, and the promotion of appropriate feeding, hygiene and care practices.

1  
2  
3  
4  
5  
6  
7  
8  
9  
10  
11  
12  
13  
14  
15  
16  
17  
18  
19  
20  
21  
22  
23  
24  
25  
26  
27  
28  
29  
30  
31  
32  
33  
34  
35  
36  
37  
38  
39  
40  
41  
42  
43  
44  
45  
46  
47  
48  
49  
50  
51  
52  
53  
54  
55  
56  
57  
58  
59  
60

Abstract word count =276

Manuscript word count excluding references= 5132

Figures: 2

Tables: 1

For peer review only

### Strengths and limitations of this study

- This study contributes to the current relatively small evidence base of qualitative studies that seek to understand how cash transfers in low and middle income settings play a role in child nutrition and wellbeing.
- Since this is a qualitative inquiry, findings cannot be generalised outside the study sites where the research was conducted. However, inferences can be drawn to broaden our understanding of how cash transfers affect child nutrition and wellbeing in low and middle income settings.

For peer review only



## Background

Food security and good nutrition are key determinants of child wellbeing[1, 2]. There is strong evidence that cash transfers are nutrition-sensitive interventions as they have the potential to help address some of the underlying drivers of food insecurity and malnutrition by providing income to caregivers in poor households[3, 4].

In South Africa the Child Support Grant (CSG) was introduced in 1998 with the main aim of providing nutrition support for children living in poor households[5]. As the largest cash transfer programme in South Africa and the continent, reaching more than two thirds of all children in the country[6], the CSG is widely regarded as the most effective child poverty alleviation strategy in the country[7]. The cash transfer pays out R340<sup>1</sup>(US\$25.40) per month to any child whose parent/s earn less than 10 times the amount of the grant per month. The CSG is non-contributory and can be received by children from birth to 18 years. It has only one ‘soft-condition’<sup>2</sup> for continued receipt: school attendance. Additionally, it has requirements attached to the application process such as the possession of an Identity Document by the mother (or primary caregiver) and of a birth certificate by the child.

Recent research on the CSG suggests however that while it mitigates extreme poverty and hunger [7-9] it does not protect against food insecurity and malnutrition[10-12]. While this fact is increasingly accepted, there is little agreement about reasons for it. Media and some commentators have argued that the grant’s lack of impact results from the fact that primary caregivers misuse it by spending it on alcohol or personal non-essentials, unrelated to the intended goals of the cash transfer programme, although these allegations have yet to be substantiated with rigorous evidence[13]. In contrast, others assert that these allegations are part of the historical pejorative discourse evident in both the Global South and North where ‘welfare’ recipients are perceived as lazy and irresponsible[14, 15].

Recent analysis suggests that although the CSG may prevent further declines in child nutritional status, it fails to improve food security and child nutrition; not because it is misused but rather because it is small and diluted by “multiple uses and multiple users”[12].

---

<sup>1</sup> At the time of data collection

<sup>2</sup> This is a so-called “soft condition” because on paper it is said to not be a condition for continued receipt but rather a mechanism for identifying and providing support to children who are struggling to stay in school, but in practice when a CSG beneficiary drops out of school, they cease to receive the grant until they return to school.

1  
2  
3 According to this evidence, the CSG is inevitably spent on several members of the household  
4 as well as the individual targeted beneficiary, and on needs other than food, reflecting the  
5 multiple elements necessary to ensure child well-being. In a related context, Leroy et  
6 al[3] provide a framework for the different inputs needed to make child cash transfers  
7 effective in improving child wellbeing and nutrition (Figure 1).  
8  
9  
10

11  
12  
13  
14 The Leroy et al[3] framework shows that giving cash transfers to women is one of 5  
15 interventions needed in a coordinated package for supporting child nutrition and wellbeing.  
16 Other interventions include food, education in health and nutrition, healthcare facility visits  
17 and education more generally. The framework underscores two important points; first, that  
18 giving cash to women (rather than a male household head) leads to an increase in  
19 household income and women's agency, which in turn leads to household food security and  
20 improvements in the quality and quantity of food that is available for children to eat.  
21 Second, that important non-food inputs are also necessary to make cash work for child  
22 nutrition and wellbeing, in particular, women's time, women's knowledge about appropriate  
23 feeding, feeding and care practices, the availability and use of health and nutrition services,  
24 and education services.  
25  
26  
27  
28  
29  
30  
31  
32  
33

34 In the considerable body of work that exists on the role and effectiveness of the CSG in  
35 improving child outcomes, there are only a few qualitative studies that explore how it works  
36 in relation to other inputs necessary for child wellbeing and nutrition. There remains a gap  
37 in understanding how and what it takes to achieve wellbeing for CSG beneficiaries growing  
38 up in poor households in South Africa. This paper attempts to address this gap. With this  
39 framework as a reference point, we present findings from a qualitative study conducted to  
40 explore the role of the CSG in food security and child wellbeing in poor households in an  
41 urban and a rural setting in South Africa. Through these findings our paper interrogates how  
42 caregivers at a micro-level utilise the CSG and explores what is necessary to support child  
43 wellbeing in the context of the grant.  
44  
45  
46  
47  
48  
49  
50  
51  
52  
53  
54  
55  
56  
57  
58  
59  
60

## Methods

This qualitative study focused on an in-depth examination of the CSG and its role in child wellbeing and food security in an urban township in Langa, Western Cape Province and in a rural setting in Mt Frere, Eastern Cape Province.

### Sampling frame

The sample of caregivers included in this study was drawn from households which participated in a longitudinal cohort study focusing on non-communicable diseases called the PURE Cohort. The study sample comprised a total of 40 in-depth interviews (20 in each site) with mothers or primary caregivers in receipt of the CSG for children under the age of 5 years. In addition, 5 focus group discussions with approximately 8 members per group were conducted. We chose to focus on children younger than 5 years because of the evidence that the first 5 years of life are the most important for nutritional outcomes that impact on childhood and beyond. We initially planned to also interview some non-recipients in order to understand dietary consumption patterns in the general population of the sampled communities, and interviewed 9 caregivers of children who were eligible but not in receipt of the grant. In practice however, it was difficult to separate non-recipient caregivers from recipients as it was often the case that eligible child non-recipients and child recipients lived in the same household and had the same primary caregiver. Thus, in addition to these 9 interviews (with primary caregivers of eligible non-recipient children), there were participants for whom the index child was in receipt of the CSG but who had another child or children who were not recipients though eligible.

Table 1 presents a profile of the study participants in terms of average household size, CSG receipt status, employment, and education levels in each site. The age range of the participants interviewed was 18-70 years, with 6 of the interviews being conducted with grandmothers who were the primary caregivers of the children selected. Marital status differed by site with fewer married respondents from Langa than Mount Frere. In Mount Frere none of the respondents was employed, while in Langa 3 participants were in formal employment. No respondent in any of the two sites had education levels beyond secondary school.

## Data collection and analysis

The lead author along with the study co-investigators developed interview topic guides which were piloted in both Langa and Mt Frere and subsequently revised before being used to conduct individual and group interviews. In 2015 the lead author together with VR conducted all in-depth qualitative interviews and focus group discussions in the two sites. The interviews were conducted in isiXhosa as this was the main language spoken in both sites.

All data were analyzed using Graneheim et al's[16] manifest and latent thematic content analysis methods<sup>3</sup>. Data were transcribed and translated into English and checked against the original recording to ensure accuracy by independent transcribers. Following each interview, field notes were written to capture the context, home environment and non-verbal communication<sup>4</sup>. These were analysed after each interview and used to guide further interviews where appropriate. The lead author read through each of the transcripts, noted initial thoughts, and began manifest coding of the data. Initial codes were grouped together into categories that were then further transformed into major themes.

## Ethics

This study received ethical approval from the South African Medical Research Council (EC036112105).

Before each interview, the interviewers explained the purpose of the interview in detail and as far as possible ensured that participants understood what agreeing to participate in the study meant. Participants who agreed to participate signed a consent form. All participants were each given grocery shopping vouchers worth R100 (US\$7.48) to compensate them for their time.

---

<sup>3</sup> A process where each transcript is first read through, then manually coded and repeated codes are categorised into themes

<sup>4</sup> Non-verbal communication such as quietly crying, sighs, eye-contact avoidance

## Results

Respondents were asked to describe in detail their decision-making about utilising the CSG, in particular, how they used it to meet children's needs and their experiences of accessing food in the context of receiving the grant. We have adapted Leroy et al's[3] framework (figure 2) to identify the main themes emanating from the data about the different strategies caregivers engaged in to ensure food security and their children's wellbeing through utilisation of the CSG. Using the adapted framework, we start off by presenting results related to: 1) Women's income control and agency; followed by 2) Household Food Security; then 3) Education: attendance at early child development (ECD) centres; and then while keeping with the theme on education and ECD centres we present findings on 4) Food served at ECD centres; and finally 5) Care practices. Where possible we contrast findings from the rural site with those of the urban setting.

### 1. Women's income control and agency

Leroy et al's[3] framework conceptualises the placing of money in women's control as a form of empowerment which leads to the availability of income in the household which women generally use for the good of the entire household. In this study, many caregivers stated that they pooled the CSG with other sources of income in the household (including other grants) and spent it on the needs of the household, with children's needs being prioritised in many of the households. The bulk of the CSG went to needs related to direct food and school-related costs, though some was spent on household needs like utilities (electricity), toiletries and transport for job-seeking or health-care.

*"... as I'm not working, sometimes I use the grant that my child gets to meet some of my needs like toiletries for myself and then I also use it for my child's needs as well. When I go looking for a job I use some of the grant and I also use it for my child's little things like lunch box things...because even the person I cohabit with is unemployed so I use that money... the grant... I buy electricity using the grant" (CSG Recipient, Langa)*

Although respondents complained that the CSG by itself was 'too small' to feed their children and meet their other many needs, they acknowledged that it allowed them to have

1  
2  
3 greater leverage both for accessing credit systems and informal reciprocal networks.  
4 Both enabled recipients to use the grant in a flexible and optimal manner. Sometimes this  
5 took the form of accessing food on credit at informal outlets (spaza shops) when they ran  
6 out of food halfway through the month:  
7  
8  
9

10 *“ [at the Somalians<sup>5</sup>] ... when I run out I can go back to them and ask for them to give me a*  
11 *2kg or a 1kg...on credit of course. When I get paid I pay them back....[I]pay for all the things*  
12 *I’ve taken during the month. I take the R350 hamper, when it is finished I go again.....they*  
13 *also know that on the 1<sup>st</sup>, M\*\*\* will pay them” (CSG recipient, Langa)*  
14  
15  
16  
17

18 Similarly, the CSG allowed caregivers to borrow from their neighbours in times of need,  
19 knowing that they would be able to repay them with the next grant pay out. In both the  
20 rural and urban study sites borrowing could be in the form of cash or food, or swapping food  
21 items. In all instances, including borrowing from a neighbour and relatives, mothers  
22 emphasised that whatever was borrowed had to be repaid at the beginning of the new  
23 month when people received their grants:  
24  
25  
26  
27  
28

29 *“We ask around in the village, maybe someone you know, like a neighbour. You say “Can you*  
30 *please give me some maize meal”, you know that you are going to mix that with whatever*  
31 *you have in the house, maybe next time she will also need the same from you...we swap*  
32 *items -maybe you have mealie-meal or potatoes and maybe that is just what she needs” (CSG*  
33 *recipient, Mt Frere)*  
34  
35  
36  
37

38 *“...[if you borrow] yes you must reimburse them. Even when you buy [your own] 12,5 kg (of*  
39 *mealie-meal) you have to pay the person back for their mealie meal...yes, indeed no one*  
40 *works for anybody else.... That is compulsory. Even now, I had borrowed some mealie meal*  
41 *from someone, I returned it in the morning” (CSG Recipient, Mt Frere)*  
42  
43  
44  
45  
46  
47  
48  
49  
50  
51  
52  
53

## 54 **2. Household Food Security**

55  
56 

---

<sup>5</sup> The term “Somalians” refers to spaza shop owners who are Somalian foreign nationals  
57

1  
2  
3 Mothers of CSG recipients provided detailed information about their spending of the CSG on  
4 food. Most primary caregivers in the study detailed feeding patterns that showed diets that  
5 were mostly starchy and sugary, with very little protein, vegetables, fruit and dairy. Mothers  
6 explained this as being a result of not having enough money.  
7  
8

9  
10 *“They [children] eat whatever is in front of them. Porridge, rice, potatoes as well. Milk no,*  
11 *they only get it when I have money, then I’ll buy them then...right now they drink Rooibos*  
12 *[tea]” (CSG recipient, Langa)*  
13  
14

15  
16 *“I don’t buy meat regularly.. I buy it on the day we get the grant or sometimes after weeks, I*  
17 *mean it is not something common that we eat meat....” (CSG recipient, Mt Frere)*  
18  
19

20 Some food items, like sugar, though unhealthy, were regarded as highly valuable, as they  
21 made basic (typically plain) food, such as maize meal (pap) or soft porridge, palatable. The  
22 importance of sugar came out particularly strongly in the rural site.  
23  
24

25  
26 *“.....you must always have some sugar, we need to have sugar because when there is*  
27 *nothing else you can always just make pap and tea and the kids could just eat that and go to*  
28 *bed, they do not have a problem” (CSG recipient, Mt Frere)*  
29  
30

31 Households experienced regular food shortages and food often ran out before the end of  
32 the month. Caregivers demonstrated resilience and resourcefulness when they ran out of  
33 food, and would often have to go to extraordinary lengths to obtain food for their children.  
34 Sometimes this meant leaving very young children in the care of their siblings to walk for  
35 miles to get food from relatives.  
36  
37

38  
39 *“What I usually do when there is no food is to wash and leave this [15 month old] child with*  
40 *the younger children and then I walk to eNcinteni... I go to my sisters in-law -my husband’s*  
41 *brothers’ wives and come back with things I can cook for the kids, like potatoes, then I make*  
42 *the fire outside in the three-legged pot and I cook for my children and they go to bed having*  
43 *eaten” (CSG recipient, Mt Frere)*  
44  
45  
46  
47  
48  
49

50 Extreme levels of food insecurity in some households led caregivers to significantly change  
51 their diets; to sacrifice their share of meals and to dilute food in order to make it go  
52 further and spread it among more children in the household. Baked food items and using  
53 products from farmed animals were other common strategies, in the rural site.  
54  
55  
56  
57

1  
2  
3 *“when there is no money we often go to bed on pap and tea. We go to bed like that...when I*  
4 *was working we would have pap and meat and potatoes, we had good zishebo<sup>6</sup>. Now it is*  
5 *difficult for us, we eat whatever is available...then sometimes I make homemade bread and*  
6 *we eat that with tea, ... –we do all of this to make sure that we do not run out of food*  
7 *quickly.....we must make sure that the food only runs out when it’s close to month end” (CSG*  
8 *recipient, Mt Frere)*

9  
10  
11  
12  
13  
14 *“I sometimes try the [Maas] that’s sold [in shops], but I myself cannot eat it, even though it’s*  
15 *my favourite. I cannot eat it because, even [my youngest] and the others eat it. You realise*  
16 *that if you buy a 2 litre or a 5 litre [Maas], I think: “If I make pap and maas for myself as well,*  
17 *this maas will get finished quickly.... but it’s supposed to last a few days [at least].” [So]*  
18 *perhaps I take...I take some spinach and cook that [for myself] ... or I make sugar water, and*  
19 *I sleep having eaten” (CSG Recipient, Mt Frere)*

20  
21  
22  
23  
24  
25 For children under 2 years old who were still thought to need formula milk, periods of food  
26 insecurity meant cutting out formula milk altogether, diluting it, reducing the frequency of  
27 bottle feeding or supplementing with cheap dairy products such as Maas (sour milk), a  
28 popular meal in Black African households.

29  
30  
31  
32 *“[In her case A\*\*] stopped having baby formula prematurely, because there was no*  
33 *money...the formula would get finished, you would see that [the formula]..that thickness is*  
34 *going down. While the child would be growing and needing more of it, it would be going*  
35 *down. So she would be eating formula which is more watery....So I got her used to my*  
36 *making sorghum porridge for her....Then I would take the baby formula, make it and pour it*  
37 *in here [with the porridge] so that she can eat something with milk in it.” (CSG recipient, Mt*  
38 *Frere)*

39  
40  
41  
42  
43  
44  
45 *“... since he’s older now, it [formula] lasts two weeks... Now, I normally feed him that in the*  
46 *morning... and then again in the evening; ... During the day... I may give him even a lump of*  
47 *pap. Now I even buy Maas for him, I even buy Maas for him and then mix it with pap for him*  
48 *in the evening.....[the formula] lasts... three weeks because I would carefully plan its use.”*  
49 *(CSG Recipient, Langa)*

50  
51  
52  
53  
54  
55  
56 

---

<sup>6</sup> Relish used to accompany a starch dish



1  
2  
3 A number of respondents shared stories of extreme hardship as they negotiated their day to  
4 day lives and tried to provide food for their children with cash transfers as the only source of  
5 income in households where adults were either all unemployed or had precarious  
6 intermittent work. Caregivers shared stories about how they 'made a plan', in very dire  
7 circumstances, to ensure that their children had food and other needs met.  
8  
9

10  
11  
12 *"You know when you're a woman, you make a plan. Mmm, to be a woman is to make a*  
13 *plan"*(CSG recipient, Mt Frere)  
14

15  
16 *"...when you milk the goats; if you're going to feed [the milk] to her – before the milk curdles*  
17 *– you filter it...you cook it until it boils, then you put it into a flask. It's very nourishing. You*  
18 *then take it and feed your infant. I mix it and mix it... so that the infant can finish that pap-*  
19 *like thing. And when her stomach is semi-full, I then take the baby bottle **and feed [her]**, then*  
20 *she sleeps..."*(CSG recipient, Mt Frere)  
21  
22  
23  
24  
25  
26  
27  
28  
29  
30  
31  
32  
33  
34  
35  
36  
37  
38  
39  
40  
41  
42  
43  
44  
45  
46  
47  
48  
49  
50  
51  
52  
53  
54  
55  
56  
57  
58  
59  
60

### 3. Education: attendance at ECD centres

In Leroy et al's[3] framework education is one of the key interventions needed to improve child nutrition and wellbeing. About 90% of the primary caregivers we interviewed had their children attending ECD centres, commonly referred to as crèches. Costs ranged from R50 to R300 a month, though the majority of children in this study attended centres charging at the lower end of this range. Some of the centres were registered while others were informal, but it was difficult to differentiate between them as primary caregivers themselves did not typically have this information. All the centres served food, with most children either receiving breakfast and lunch, or lunch only. A significant proportion of the CSG went towards crèche-related costs. In addition to direct fees this included, transport, lunchboxes and snacks, school bags, and in the case of Mt Frere, chairs to sit on.

*"Like... this one's [child support grant], I don't even touch it; it goes to the crèche. I pay for her crèche [with the money]. It's R230, yes, plus ... they must also pay for snacks." (CSG Recipient, Langa)*

*"[Crèche] is R180 [per month] this year, I don't know next year if it will still be the same.... and then money for transport is R140 [per month]." (CSG Recipient, Langa)*

Caregivers went to great lengths to obtain relatively expensive food items such as juice (concentrate), fat spread, eggs, and snacks for their children to carry to school. This was the case even in the crèches that served food –caregivers still felt the need to send their children to school with a special packed lunch.

*"[the CSG] makes a difference. A small difference...but it makes one because, as I say to you, ...in the morning when they go to school I give them an egg... and chips, and bread, a slice of bread..."(CSG Recipient, Mt Frere)*

*"Then you have to try to get some juice, you have to try to get some Rama [margarine]... if you don't have eggs. [But] not the real Rama™, these lesser Rama's... you then spread, and spread, and spread [the Rama to make it go further], you put in the juice and the child leaves." (CSG Recipient, Mt Frere)*

#### 4. Food served at ECD centres

Even though all the crèches served food –as much as 2 meals a day in many centres -it was difficult to ascertain exactly what was served at the crèches. Many respondents could mention one or two items of food or meals that they thought their children were eating but had no detailed information of the food served for breakfast and lunch in a five day week.

*“There is usually breakfast...porridge... they said it is porridge....Or otherwise, there is also a Morvite<sup>7</sup> day. I’m not sure [what else] now.” (CSG Recipient, Langa)*

Some caregivers felt that the food served at crèches was not enough, and that this was the reason they felt it necessary to send their children with additional food, and why they had to have something ready for them to eat in the afternoon after crèche. It was not possible to accurately measure this since many respondents were not clear about what was served at creches or the portion sizes. Some caregivers did however observe that their children oftencame back from crèche thirsty and hungry.

*“They get food from the school....No, it’s not enough of course. These are people who, as they come in, because they’re children, they say: “We’re thirsty, may we please have juice. We’re hungry... and so on” (CSG recipient, Mt Frere)*

#### 5. Care practices

It was clear that our respondents, like all caregivers, spent a lot of time on care practices which served their children’s needs including food preparation and laundry. However, having enough soap to wash the children and to wash their clothes was a constant theme of many caregivers interviewed in this study, who talked about how expensive and scarce soap was. Mothers placed a lot of value in presenting their children with clean clothes.

*“In fact when [grandchild] was growing, she grew up with how many towel diapers? Four of them. Two for travelling, and two for when she was at home. Even my apron would*

---

<sup>7</sup> Sorghum sweetened instant porridge

1  
2  
3 *sometimes help out as a diaper. And I would wash them... but the soap would be*  
4 *scarce...".(CSG recipient, Mt Frere)*

5  
6  
7 *"...Soap is needed every day... because every day Sunlight™ is used for the baby's washing;*  
8 *[to buy soap] I might go and get a cleaning job, and then I'd buy the soap [with my*  
9 *earnings]... I would even hide it because the older ones would take some. If we had some, I*  
10 *would take it and wrap it, and wrap it, and wrap it... and hide it. And hide it in a place that*  
11 *they couldn't find it... I would remember [to hide it]. Yho!" (CSG recipient, Mt Frere)*  
12  
13  
14  
15

16 The amount of time spent caring for children was significantly expanded in many  
17 households. In rural Mt Frere caregivers talked about rising at the crack of dawn, in order to  
18 prepare their children for school.  
19  
20

## 21 **Discussion**

22 This study contributes to the current relatively small evidence base of qualitative studies  
23 that seek to understand how cash transfers in low and middle income settings play a role in  
24 child nutrition and wellbeing. Since this is a qualitative inquiry, findings cannot be  
25 generalised outside the study sites where the research was conducted. However, inferences  
26 can be drawn to broaden our understanding of how cash transfers affect child nutrition and  
27 wellbeing in low and middle income settings.  
28  
29  
30  
31  
32  
33

34 Despite the original focus of the CSG on providing nutrition support to children in poor  
35 households, it is well known from literature that it takes many different inputs in addition to  
36 food to achieve good nutrition and general child wellbeing. Findings from this paper show  
37 how the various needs that children and households have, affect the strategies used  
38 and trade-offs made by caregivers in the utilisation of CSG.  
39  
40  
41  
42  
43

44 Our results support evidence reported by others which demonstrate that while the CSG is  
45 an important nutrition-sensitive intervention, malnutrition is complex, and requires a  
46 coordinated package of nutrition specific and nutrition sensitive interventions[12].  
47 Moreover, on its own, the CSG is clearly a small amount of money and therefore,  
48 irrespective of the multiple uses it needs to have, has limited ability to provide even  
49 adequate quality nutritious food for a child. In the context of rising food prices as observed  
50 in 2016, even if the CSG was spent exclusively on nutritious food for beneficiaries alone, at  
51 its 2016 value (R350) it would "cover less than two-thirds of the minimum food needs of a  
52  
53  
54  
55  
56  
57  
58  
59  
60

1  
2  
3 young child (63%) or an older child (58%)”[12]. The Pietermaritzburg Agency for Community  
4 Social Action (PACSA) Food Price Barometer for September 2016 calculated that the cost of  
5 a basic but nutritious food basket for a young child was R537.48 per month, way above the  
6 R350 value of the CSG at the time[17].The CSG is not only small, it is also diluted among  
7  
8 “multiple users and multiple uses”[11, 12]as shown in this study. It can be argued that in a  
9  
10 context of widespread poverty and high unemployment rates, it is impractical and unethical  
11  
12 to expect caregivers to ring-fence expenditure of the CSG on child beneficiaries only.  
13  
14

15  
16 The findings from this study confirmed Leroy et al’s framework[3], that increasing women’s  
17  
18 income control facilitated attempts to mitigate food insecurity. Giving cash to women gave  
19  
20 them control over a portion of the household income that only they had a say in how it  
21  
22 should be spent. As reported in other studies[18, 19]placing the CSG in the hands of women  
23  
24 allowed them to leverage it to access reciprocal networks in the form of neighbours,  
25  
26 relatives and access to informal credit when food ran out. The findings from this study  
27  
28 indicate that these systems of reciprocity were intricate and elaborate mechanisms and  
29  
30 were crucial life lines for communities with few other margins.At every turn  
31  
32 caregiversstruggled: with food insecurity, where children had poor diets and mothers had to  
33  
34 employ different strategies to ensure that there was food; in care practices, where the  
35  
36 inadequacy of the grant made basics like soap a precious commodity; in accessing ECD  
37  
38 services, where costs included fees, transport, lunchboxes and even in some cases, furniture  
39  
40 and equipment.

41  
42 Interventions such as ECD centres in South Africa hold a lot of promise in helping to meet  
43  
44 the food needs of children from poor households. Ruel et al[4] emphasise the importance  
45  
46 of ECD interventions with or without a nutrition component in tackling malnutrition. In  
47  
48 South Africa the ECD programme has a nutrition component, and as shown in this study it  
49  
50 potentially makes up a significant amount of a child’s daily food intake. However, it is not  
51  
52 well researched in terms of dietary quality and adequacy. Significantly however, though  
53  
54 mothers prioritised early childhood education, it is important to note that it is not free. As  
55  
56 indicated, the direct and indirect costs associated with attendance at ECD centres, took up  
57  
58 the whole grant in some households.

59  
60 Taken together, our findings show that in the context of a non-comprehensive social  
security system caregivers constantly made trade-offs to meet essential needs –food vs

1  
2  
3 education vs care practices. There was no evidence of misuse. Instead, in the context of  
4 fundamental, pressing and competing needs, rational decisions were made about how to  
5 spend this small cash transfer.  
6  
7

8  
9 In their working paper on food security and social grants published in 2017, Devereux and  
10 Waidler[12] point out that while social grants in South Africa are an important source of  
11 income for poor households, the amounts they transfer to households need to rise and  
12 should be linked to the amount of money needed to buy a nutritious food basket. The  
13 authors further recommend that social protection provision should be framed within “cash  
14 plus” models that are linked to broader non-cash services and inputs such as health,  
15 education, social services and sanitation and the promotion of appropriate nutrition and  
16 hygiene practices. Current interest in “cash plus” models arises out of the growing  
17 recognition that it takes more than cash or a narrow focus on food to improve child  
18 wellbeing[20]. In South Africa “plus” components such as free education or subsidised ECD  
19 services are in place, but as this paper has shown, access still comes with hidden costs.  
20  
21  
22  
23  
24  
25  
26  
27  
28  
29

### 30 **Conclusion**

31  
32 This study has demonstrated that caregivers make rational decisions and employ different  
33 strategies that ultimately serve –even if in a small, limited way –the actual goals of the CSG:  
34 child wellbeing and nutrition. The recent public furore around threats to the disbursements  
35 of social grants in South Africa was proof once again of how indispensable cash transfers  
36 such as the CSG have become to the survival of households in South Africa. It is indisputable  
37 that the CSG plays an important role in childhood poverty alleviation efforts in South Africa.  
38 However it is not a panacea. This paper has presented results which confirm previous  
39 findings about the inadequacy of the CSG to meet its goal of providing support for nutrition.  
40 However, in a context of high unemployment rates, soaring food prices, rising cost of living  
41 and the lack of coordination between other nutrition-sensitive and nutrition-specific  
42 interventions, their efforts were undermined by a cash transfer that was too small in value  
43 to make a meaningful difference to child nutrition. Thus, while the CSG is important, much  
44 more emphasis should be placed on parallel structural solutions that are important in  
45 ensuring good nutrition outcomes and wellbeing. These would include access to free quality  
46  
47  
48  
49  
50  
51  
52  
53  
54  
55  
56  
57  
58  
59  
60

1  
2  
3 ECD services that provide adequate nutritious meals, access to basic services that impact on  
4 nutritional outcomes such as housing with adequate water and sanitation services, and the  
5 promotion of appropriate feeding, hygiene and care practices. Such measures would form  
6 part of a coordinated response to improve child wellbeing, consisting of a package of  
7 nutrition sensitive and nutrition specific interventions, in addition to raising the value of the  
8 CSG, and creating a comprehensive social security system in South Africa that provides for  
9 people through the life course.  
10  
11  
12  
13  
14

15 Further research, both qualitative and quantitative, is needed to understand how nutrition-  
16 sensitive non-food inputs such as ECD services and care arrangements work to impact on  
17 child nutrition and wellbeing within a “cash plus” framework.  
18  
19  
20  
21  
22  
23  
24  
25  
26  
27  
28  
29  
30  
31  
32  
33  
34  
35  
36  
37  
38  
39  
40  
41  
42  
43  
44  
45  
46  
47  
48  
49  
50  
51  
52  
53  
54  
55  
56  
57  
58  
59  
60

## References

1. Hendriks, S., *Food security in South Africa: Status quo and policy imperatives*. Agrekon, (2014). **53**(2): p. 1-24.
2. Ruel, M., Hoddinott, J., *Investing in early childhood nutrition*. 2008, IFPRI: Washington DC.
3. Leroy, J., M. Ruel, and E. Verhofstadt, *The impact of conditional cash transfer programmes on child nutrition: a review of evidence using a programme theory framework*. Journal of Development Effectiveness, 2009. **1**(2): p. 103-129.
4. Ruel, M., Alderman, H. , *Nutrition-sensitive interventions and programmes: how can they help to accelerate progress in improving maternal and child nutrition?* Lancet 2013. **382**: p. 536-51.
5. Lund, F., *Changing Social Policy*. 2007, Cape Town: HSRC Press.
6. May, J., *Why child malnutrition is still a problem in South Africa 22 years into democracy*, in *Health and Medicine*, C. Bailey, Editor. 2016, The Conversation: South Africa.
7. Hall, K., Sambu, W., Berry L., Giese, S., Almeleh, and S. C. and Rosa, *South African Early Childhood Review 2016*. South African Early Childhood Review 2016, ed. A. Delany, Jehoma, S., Lake, L (eds.). (2016), Cape Town: Children's Institute, University of Cape Town and Ilifa Labantwana.
8. Samson, M., Lee, U., Ndlebe, A., Mac Quene, K., van Niekerk, I., Gandhi, V., Harigaya, T., Abrahams, C., *The Social and Economic Impact of South Africa's Social Security System*. 2004, Commissioned by the Directorate: Finance and Economics, Department of Social Development: Pretoria.
9. Pienaar P.L. & Von Fintel D.P, *Hunger in the former apartheid homelands: Determinants of converging food security 100 years after the 1913 Land Act.*, in *Stellenbosch Economic Working Papers 26/2013*, U.o. Stellenbosch, Editor. 2013: Cape Town.
10. Battersby, J., *The State of Urban Food Insecurity in Cape Town.*, in *Urban Food Security Series* (2011), Queen's University and AFSUN: Kingston and Cape Town.
11. Coetzee, M., *Finding the Benefits: Estimating the Impact of the South African Child Support Grant.* South African Journal of Economics, (2013). **81**((3)): p. 427-450.
12. Devereux, S., Waidler, J. , "Why does malnutrition persist in South Africa despite social grants?" in *Food Security SA Working Paper Series No.001.* , D.-N.C.o.E.i.F. Security, Editor. (2017): South Africa.
13. Mpike, M., Wright, G., Rohrs, S., Mohamed, Z., Mzankomo, L. , *Common concerns and misconceptions: what does the evidence say?*, in *South African Child Gauge 2016*, A. Delany, Jehoma, S., Lake, L (eds.), Editor. 2016, University of Cape Town: Cape Town. p. 55-59.
14. Fraser, N., Gordon, L., , *A Genealogy of Dependency: Tracing a Keyword of the U.S Welfare State*. The University of Chicago Press. , (1994) **Vol. 19**(No. 2): p. pp 309-336.
15. Mead L., *The New Politics of Poverty: The Non-working Poor in America*. (1992), US: Basic Books.
16. Graneheim, U., Lundman, B. , *Qualitative content analysis in nursing research: concepts, procedures and measures to achieve trustworthiness*. Nurse Education Today, 2004. **24**: p. 105-112
17. Smith, J., Abrahams, M., , *2016 PACSA Food Price Barometer Annual Report 2016*, Pietermaritzburg Agency for Community Social Action: Pietermaritzburg.
18. du Toit, A., Neves, D. , *Informal Social Protection in Post-Apartheid Migrant Networks: Vulnerability, Social Networks and Reciprocal Exchange in the Eastern and Western Cape, South Africa*. 2009, Brooks World Poverty Institute. [www.manchester.ac.uk/bwpi](http://www.manchester.ac.uk/bwpi).
19. Zembe-Mkabile, W., Surrender, R., Sanders, D., Jackson, D., Doherty, T.,, *The experience of cash transfers in alleviating childhood poverty in South Africa: mothers' experiences of the Child Support Grant*. Glob Public Health, 2015. **10**(7): p. 834-51.



1  
2  
3  
4  
5  
6  
7  
8  
9  
10  
11  
12  
13  
14  
15  
16  
17  
18  
19  
20  
21  
22  
23  
24  
25  
26  
27  
28  
29  
30  
31  
32  
33  
34  
35  
36  
37  
38  
39  
40  
41  
42  
43  
44  
45  
46  
47  
48  
49  
50  
51  
52  
53  
54  
55  
56  
57  
58  
59  
60

20. Roelen, K., Delap, E., Jones, C., Karki Chettri, H., *Improving child wellbeing and care in Sub-Saharan Africa: The role of social protection*. Children and Youth Services Review, 2017. **73**: p. 309-318.

For peer review only

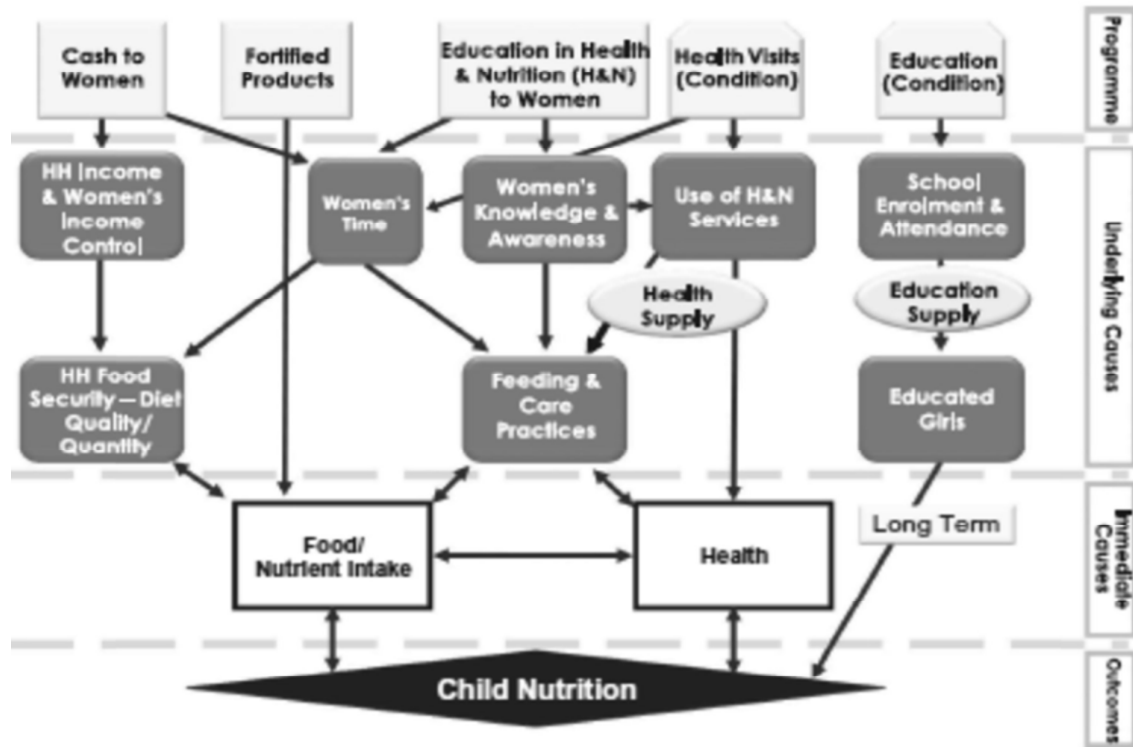

Figure 1: Mechanisms by which cash transfer programs might affect child nutrition. Source: Leroy, J., Ruel, M., Verhofstadt, E., 2009. The impact of conditional cash transfer programmes on child nutrition: a review of evidence using a programme theory framework. *J. Dev. Eff.* 1, 103–129.

**Table 1: Profile of participants in the study**

| Site            | Avg hh size | Age range of caregivers | No. of hh with no CSG | Caregivers in formal employment | Caregivers who have not completed secondary school | Caregivers who have completed secondary school |
|-----------------|-------------|-------------------------|-----------------------|---------------------------------|----------------------------------------------------|------------------------------------------------|
| <b>Mt Frere</b> | <b>5</b>    | <b>18-70</b>            | <b>5</b>              | <b>0</b>                        | <b>18</b>                                          | <b>5</b>                                       |
| <b>Langa</b>    | <b>4</b>    | <b>18-65</b>            | <b>4</b>              | <b>3</b>                        | <b>8</b>                                           | <b>18</b>                                      |

Figure 2: Adapted conceptual framework for study findings

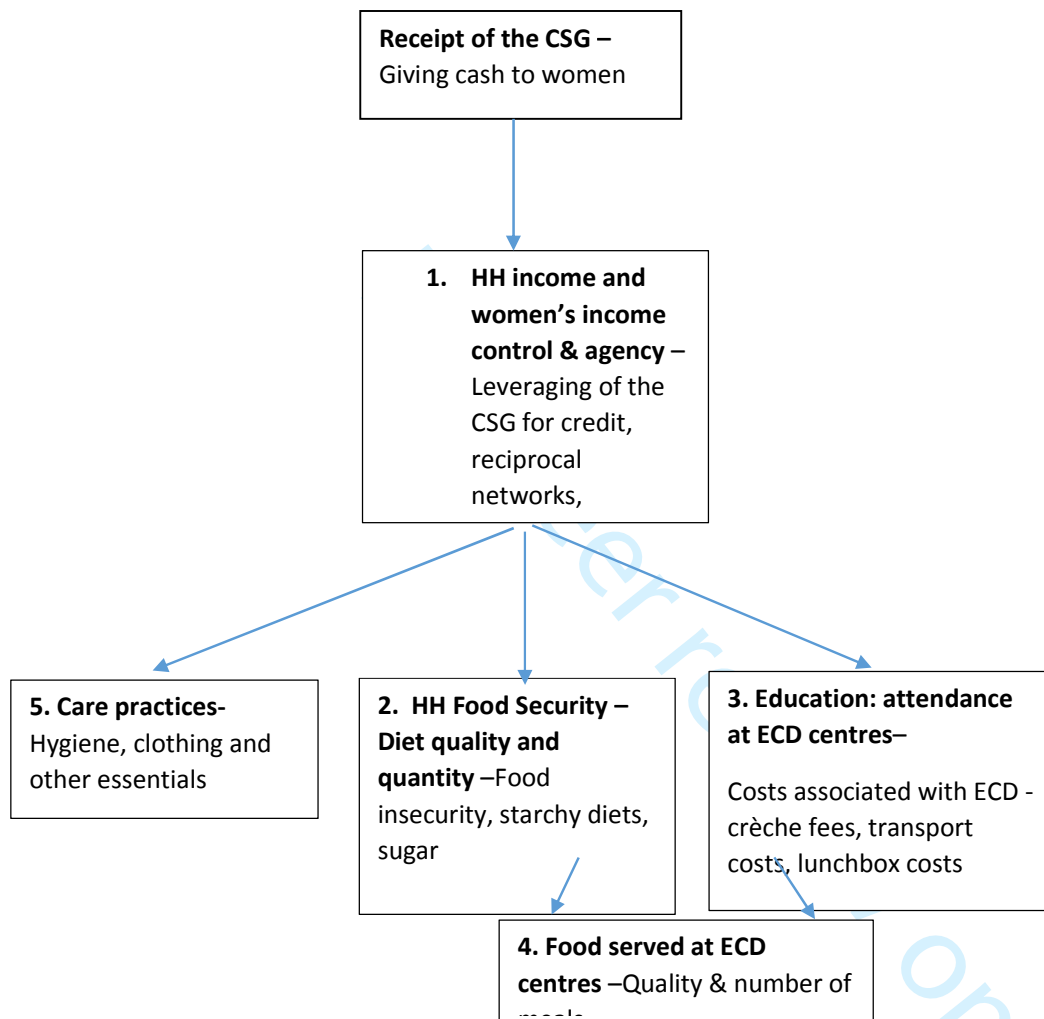

# BMJ Open

## **“To be a woman is to make a plan”: Mothers’ experiences of the Child Support Grant in supporting children’s diets and nutrition in South Africa**

|                                 |                                                                                                                                                                                                                                                                                                                                                                                                                                                                                                                                                                                                                                                                                                                                                                                                                                                                                                               |
|---------------------------------|---------------------------------------------------------------------------------------------------------------------------------------------------------------------------------------------------------------------------------------------------------------------------------------------------------------------------------------------------------------------------------------------------------------------------------------------------------------------------------------------------------------------------------------------------------------------------------------------------------------------------------------------------------------------------------------------------------------------------------------------------------------------------------------------------------------------------------------------------------------------------------------------------------------|
| Journal:                        | <i>BMJ Open</i>                                                                                                                                                                                                                                                                                                                                                                                                                                                                                                                                                                                                                                                                                                                                                                                                                                                                                               |
| Manuscript ID                   | bmjopen-2017-019376.R1                                                                                                                                                                                                                                                                                                                                                                                                                                                                                                                                                                                                                                                                                                                                                                                                                                                                                        |
| Article Type:                   | Research                                                                                                                                                                                                                                                                                                                                                                                                                                                                                                                                                                                                                                                                                                                                                                                                                                                                                                      |
| Date Submitted by the Author:   | 13-Dec-2017                                                                                                                                                                                                                                                                                                                                                                                                                                                                                                                                                                                                                                                                                                                                                                                                                                                                                                   |
| Complete List of Authors:       | Zembe-Mkabile, Wanga; Medical Research Council, Health Systems Research Unit; Southern African Social Policy Research Institute<br>Surrender, Rebecca; University of Oxford , Department of Social Policy and Intervention; Rhodes University, Institute of Social and Economic Research<br>Sanders, David; University of Western Cape, School of Public Health;<br>University of Cape Town, Department of Paediatrics and Child Health, Faculty of Health Sciences<br>Swart, Rina; University of the Western Cape, Department of Dietetics and Nutrition<br>Ramokolo, Vundli; Medical Research Council, Health Systems Research Unit<br>Wright, Gemma ; Southern African Social Policy Research Institute;<br>University of South Africa, Archie Mafeje Research Institute<br>Doherty, Tanya; Medical Research Council, Health Systems Research Unit;<br>University of Western Cape, School of Public Health |
| <b>Primary Subject Heading</b>: | Nutrition and metabolism                                                                                                                                                                                                                                                                                                                                                                                                                                                                                                                                                                                                                                                                                                                                                                                                                                                                                      |
| Secondary Subject Heading:      | Qualitative research, Nutrition and metabolism                                                                                                                                                                                                                                                                                                                                                                                                                                                                                                                                                                                                                                                                                                                                                                                                                                                                |
| Keywords:                       | cash transfers, food security, Community child health < PAEDIATRICS, child nutrition, south africa                                                                                                                                                                                                                                                                                                                                                                                                                                                                                                                                                                                                                                                                                                                                                                                                            |
|                                 |                                                                                                                                                                                                                                                                                                                                                                                                                                                                                                                                                                                                                                                                                                                                                                                                                                                                                                               |

SCHOLARONE™  
Manuscripts

1  
2  
3 **“To be a woman is to make a plan”: Mothers’ experiences of the Child Support Grant in**  
4 **supporting children’s diets and nutrition in South Africa**  
5  
6  
7

8  
9 **Wanga Zembe-Mkabile<sup>1,2</sup>, Rebecca Surender<sup>3,4</sup>, David Sanders<sup>5,6</sup>, Rina Swart<sup>7</sup>, Vundli**  
10 **Ramokolo<sup>1</sup>, Gemma Wright<sup>2,8</sup>, and Tanya Doherty<sup>1,5,9</sup>**  
11  
12

13 **Corresponding author:** Wanga Zembe-Mkabile  
14

15 Address: Medical Research Council of South Africa  
16

17 Francie van Zyl Dr  
18

19 Parow Valley  
20

21 Cape Town  
22

23 7500  
24

25 Email: wanga.zembe@mrc.ac.za; wanga.zembe@gtc.ox.ac.uk  
26

27 Tel: 0027 21 938 0447/Fax: 0027 21 938 0483  
28  
29  
30  
31  
32  
33

34 **Author affiliations and qualifications:**  
35

36 1. Dr Wanga Zembe-Mkabile  
37

38 Qualifications: MSc, DPhil Social Policy  
39

40 Affiliations:  
41

- 42 1. Health Systems Research Unit, South African Medical Research Council
- 43 2. Southern African Social Policy Research Institute

44 b. Prof Rebecca Surender  
45

46 Qualifications: MSc; DPhil Sociology  
47

48 Affiliation:  
49

- 50 3. Department of Social Policy and Intervention, University of Oxford  
51  
52  
53  
54  
55  
56  
57

1  
2  
3 4. Institute of Social & Economic Research, Rhodes University  
4  
5  
6  
7  
8  
9

10 c. Prof David Sanders

11 Qualifications: MD, MRCP, DSc

12 Affiliation:

13  
14  
15  
16  
17 5. School of Public Health, University of the Western Cape

18 6. Department of Paediatrics and Child Health, Faculty of Health Sciences, University of  
19 Cape Town  
20  
21

22 e. Prof Rina Swart

23 Qualifications: MPhil (Public Health), PhD

24 Affiliation:

25  
26  
27  
28  
29 7 Department of Dietetics and Nutrition, University of the Western Cape  
30  
31

32 f. Ms Vundli Ramokolo

33 Qualifications: MPH

34 Affiliation:

35  
36  
37  
38  
39 1. South African Medical Research Council  
40  
41

42 g. Prof Gemma Wright

43 Qualifications: MSt, DPhil Social Policy

44 Affiliation:

45  
46  
47  
48 2. Southern African Social Policy Research Institute

49  
50  
51 8 Archie Mafeje Research Institute, University of South Africa  
52

53 h. Prof Tanya Doherty

54 Qualifications: MPH, PhD Public Health  
55  
56  
57

**Affiliation:**

1. Health Systems Research Unit, South African Medical Research Council
5. School of Public Health, University of the Western Cape
9. School of Public Health, University of Witwatersrand

**Keywords:** child support grant, cash transfers; child wellbeing, food security, child nutrition

**Acknowledgements**

This study was financially supported through the DST/NRF Centre of Excellence in Food Security. We thank the caregivers and their families for their contribution to this study. We also wish to thank Professor Stephen Devereux for reading the first draft of this manuscript and providing insightful comments that helped to strengthen it.

**Contributorship Statement**

WZM, VR, TD, DS, RS, RS, GW conceptualised and designed the study. WZM and VR conducted the interviews. Data were coded and analysed by WZM, and the coding and analysis were checked by VR, TD, DS, RS, and RS. WZM wrote the first draft of the manuscript and thereafter all co-authors made inputs on all drafts of the manuscript.

**Data Sharing Statement**

The study data comprises of audio recordings, transcripts, transcript summaries and coded analysis. The coded analysis is available for reviewers should they wish to access it. We are unable to make the audio recordings and transcripts available as we did not seek permission for this from participants at the start of the study when we collected data.

**Conflict of interest:** None to declare



## Abstract

Food security and good nutrition are key determinants of child wellbeing. There is strong evidence that cash transfers such as South Africa's Child Support Grant (CSG) have the potential to help address some of the underlying drivers of food insecurity and malnutrition by providing income to caregivers in poor households, but it is unclear how precisely they work to affect child wellbeing and nutrition. We present results from a qualitative study conducted to explore the role of the CSG in food security and child wellbeing in poor households in an urban and a rural setting in South Africa.

**Setting:** Mt Frere, Eastern Cape (rural area); Langa, Western Cape (urban township).

**Participants:** CSG recipient caregivers and community members in the two sites. We conducted a total of 40 in-depth interviews with mothers or primary caregivers in receipt of the CSG for children under the age of 5 years. In addition, 5 focus group discussions with approximately 8 members per group were conducted. Data were analysed using manifest and latent thematic content analysis methods.

**Results:** The CSG is too small on its own to improve child nutrition and wellbeing. Providing for children's diets and nutrition competes with other priorities that are equally important for child wellbeing and nutrition.

**Conclusions:** In addition to raising the value of the CSG so that it is linked to the cost of a nutritious basket of food, more emphasis should be placed on parallel structural solutions that are vital for good child nutrition outcomes and wellbeing, such as access to free quality early child development services that provide adequate nutritious meals, access to adequate basic services, and the promotion of appropriate feeding, hygiene and care practices.

Abstract word count =279

Manuscript word count excluding references= 7076

Figures: 1

Tables: 1

**Strengths and limitations of this study**

- This study contributes to the current relatively small evidence base of qualitative studies that seek to understand how cash transfers in low and middle income settings play a role in child nutrition and wellbeing.
- Since this is a qualitative inquiry, findings cannot be generalised outside the study sites where the research was conducted. However, inferences can be drawn to broaden our understanding of how cash transfers affect child nutrition and wellbeing in low and middle income settings.

## Background

Food security and good nutrition are key determinants of child wellbeing[1, 2]. There is global consensus in the literature that health and nutritional status in early life have impacts that go beyond childhood, affecting human development and later life productivity. Poor child health outcomes such as undernutrition in the early years of life, especially the first 1000 days, have irreversible negative ripple effects on illness and disability, timing of entry into school, educational attainment, economic productivity, and ultimately, the transmission of poverty from generation to generation[2, 3]. Stunting -defined as height-for-age of <-2 z-scores below the median -is a measure of chronic inadequate dietary intake and reflects long term under-nutrition. While the evidence on levels of stunting in South Africa appears mixed, with some reporting a modest decline on the one extreme[4, 5], and others reporting increasing rates on the other[1], one fact remains clear; South Africa continues to experience stunting rates for children under 5 that are inconsistent with its standing as an upper middle-income country[6-8]. Different data sources on stunting report different rates for the period 1993-2012, as a result of using different sampling frames, sample sizes and age ranges of children measured, but whichever sources are used, the clear message is that stunting rates have at best moderately improved or at worst stagnated during this period – never going above 30% and never reducing below 20%[7]. In 1993 stunting rates for under 5s in South Africa were as high as 30%, in 2008 about 25% of children were reported to be stunted[6, 9], and in 2012 they were between 21.5% and 26.4%[1, 7]. The latest South African Demographic Health Survey (DHS) reports stunting at 27% for children under 5 in 2016[10].

There is a growing view among policymakers that cash transfers (CTs) have the potential to help address some of the underlying drivers of food insecurity and malnutrition by providing income to caregivers in poor households[3, 4]. As a result, CTs have become a policy instrument of choice for addressing a range of child health and development outcomes. Over 130 countries in the Global South have unconditional cash transfer (UCTs) programmes and about 63 have conditional cash transfer programmes[11]. However, specific evidence on child cash transfers and nutrition is mixed. In 2012 a rapid review of evidence on conditional and unconditional cash transfers in low and middle income countries found that overall they had no impact on child-height for age[12]. More recently, a rigorous review of

1  
2  
3 evidence on child cash transfers implemented in low and middle income settings found that  
4 only 5 out of 13 impact assessments reported statistically significant improvements in  
5 stunting[11]. Bastagali et al[11] suggest that the challenge to determining the impact of cash  
6 transfers on child growth measures is the fact that child growth is not influenced through  
7 income support alone.  
8  
9  
10

11  
12  
13  
14 In South Africa the Child Support Grant (CSG) was introduced in 1998 with the main aim of  
15 providing nutrition support for children living in poor households[13]. As the largest cash  
16 transfer programme in South Africa and the continent, reaching more than two thirds of all  
17 children in the country[8], the CSG is widely regarded as the most effective child poverty  
18 alleviation strategy in the country[9]. The cash transfer pays out R340<sup>1</sup> (US\$25.40) per  
19 month to any child whose parent/s earn less than 10 times the amount of the grant per  
20 month. The CSG is non-contributory and can be received by children from birth to 18 years.  
21 It has only one 'soft-condition'<sup>2</sup> for continued receipt: school attendance. Additionally, it has  
22 requirements attached to the application process such as the possession of an Identity  
23 Document by the mother (or primary caregiver) and of a birth certificate by the child.  
24  
25  
26  
27  
28  
29  
30  
31

32 Early research on the CSG indicated that the grant was associated with improved height-for-  
33 age growth for children under 3[14], and reduced hunger[15]. Recent research on the CSG  
34 suggests however that while it mitigates extreme poverty and hunger [9, 15, 16] it does not  
35 protect against food insecurity and malnutrition[7, 17, 18]. While this fact is increasingly  
36 accepted, there is little agreement about reasons for it. Media and some commentators  
37 have argued that the grant's lack of impact results from the fact that primary caregivers  
38 misuse it by spending it on alcohol or personal non-essentials, unrelated to the intended  
39 goals of the cash transfer programme, although these allegations have yet to be  
40 substantiated with rigorous evidence[19]. In contrast, others assert that these allegations  
41 are part of the historical pejorative discourse evident in both the Global South and North  
42 where 'welfare' recipients are perceived as lazy and irresponsible[20, 21].  
43  
44  
45  
46  
47  
48  
49  
50  
51

---

52  
53 <sup>1</sup> At the time of data collection

54 <sup>2</sup> This is a so-called "soft condition" because on paper it is said to not be a condition for continued receipt but  
55 rather a mechanism for identifying and providing support to children who are struggling to stay in school, but  
56 in practice when a CSG beneficiary drops out of school, they cease to receive the grant until they return to  
57 school.  
58

1  
2  
3 Recent analysis suggests that although the CSG may prevent further declines in child  
4 nutritional status, it fails to improve food security and child nutrition; not because it is  
5 misused but rather because it is small and diluted by “multiple uses and multiple users”[7].  
6 According to this evidence, the CSG is inevitably spent on several members of the household  
7 as well as the individual targeted beneficiary, and on needs other than food, reflecting the  
8 multiple elements necessary to ensure child well-being. In a related context, Leroy et al[22]  
9 provide a framework for the different inputs needed to make child cash transfers effective  
10 in improving child wellbeing and nutrition (Figure 1).  
11  
12  
13  
14  
15  
16  
17  
18

19 The Leroy et al[22] framework shows that giving cash transfers to women is one of 5  
20 interventions needed in a coordinated package for supporting child nutrition and wellbeing.  
21 Other interventions include food, education in health and nutrition, healthcare facility visits  
22 and education more generally. The framework underscores two important points; first, that  
23 giving cash to women (rather than a male household head) leads to an increase in  
24 household income and women’s agency, which in turn leads to household food security and  
25 improvements in the quality and quantity of food that is available for children to eat.  
26 Second, that important non-food inputs are also necessary to make cash work for child  
27 nutrition and wellbeing, in particular, women’s time, women’s knowledge about  
28 appropriate feeding, feeding and care practices, the availability and use of health and  
29 nutrition services, and education services.  
30  
31  
32  
33  
34  
35  
36  
37  
38

39 In the considerable body of work that exists on the role and effectiveness of the CSG in  
40 improving child outcomes, there are only a few qualitative studies that explore how it works  
41 in relation to other inputs necessary for child wellbeing and nutrition. There remains a gap  
42 in understanding how and what it takes to achieve wellbeing for CSG beneficiaries growing  
43 up in poor households in South Africa. This paper attempts to address this gap. With this  
44 framework as a reference point, we present findings from a qualitative study conducted to  
45 explore the role of the CSG in food security and child wellbeing in poor households in an  
46 urban and a rural setting in South Africa. Through these findings our paper interrogates how  
47 caregivers at a micro-level utilise the CSG and explores what is necessary to support child  
48 wellbeing in the context of the grant.  
49  
50  
51  
52  
53  
54  
55  
56  
57  
58  
59  
60

## Methods

This qualitative study focused on an in-depth examination of the CSG and its role in child wellbeing and food security in an urban township in Langa, Western Cape Province and in a rural setting in Mt Frere, Eastern Cape Province.

### Sampling frame

The sample of caregivers included in this study was drawn from households which participated in a longitudinal cohort study focusing on non-communicable diseases called the PURE Cohort. While the CSG is available for both female and male primary caregivers to access on behalf of eligible children, the majority of claimants (more than 95%) are women. Thus in this study all the participants were women. The study sample comprised a total of 40 in-depth interviews (20 in each site) with mothers or primary caregivers in receipt of the CSG for children under the age of 5 years. In addition, 5 focus group discussions with approximately 8 members per group were conducted. The focus group discussions were conducted to gather a community level perspective on the role of the CSG in children's diets and food security, and how women were securing food for their children

We chose to focus on children younger than 5 years because of the evidence that the first 5 years of life are the most important for nutritional outcomes that impact on childhood and beyond.

In some households a family member was present during the individual interviews, in particular in a number of instances where we were talking with the biological mother of the index child, the grandmother would be present. In all instances we ensured that the participant was happy for us to continue with the interview in the presence of another individual. Often the family member would be called upon by the participant to corroborate or remind her of certain facts.

Table 1 presents a profile of the study participants in terms of average household size, CSG receipt status, employment, and education levels in each site. The age range of the participants interviewed was 18-70 years, with 6 of the interviews being conducted with grandmothers who were the primary caregivers of the children selected. Marital status differed by site with fewer married respondents from Langa than Mount Frere. In Mount

1  
2  
3 Frere none of the respondents was employed, while in Langa 3 participants were in formal  
4 employment. No respondent in any of the two sites had education levels beyond secondary  
5 school. In this manuscript only data and findings from recipients are presented.  
6  
7

### 8 **Data collection and analysis**

9  
10 The lead author along with the study co-investigators developed interview topic guides  
11 which were piloted in both Langa and Mt Frere and subsequently revised before being used  
12 to conduct individual and group interviews. In 2015 the lead author together with VR  
13 conducted all in-depth qualitative interviews and focus group discussions in the two sites.  
14 The interviews were conducted in isiXhosa as this was the main language spoken in both  
15 sites. When time and logistical circumstances permitted WZM and VR would have a  
16 discussion after each interview, comparing notes on the themes they felt were emerging.  
17 Interviews were conducted until data saturation was achieved.  
18  
19  
20  
21  
22  
23  
24

25 All data were analyzed using Graneheim et al's[23] manifest and latent thematic content  
26 analysis methods<sup>3</sup>. Data were transcribed and translated into English and checked against  
27 the original recording to ensure accuracy by independent transcribers. Following each  
28 interview, field notes were written to capture the context, home environment and non-  
29 verbal communication<sup>4</sup>. These were analysed after each interview and used to guide further  
30 interviews where appropriate. The lead author read through each of the transcripts, noted  
31 initial thoughts, and began manifest coding of the data. A list of all interviews and  
32 transcripts was captured in Excel and manual copying and pasting of passages of text from  
33 Microsoft Word was undertaken during the categorisation of data. Although the lead author  
34 coded the data, there was extensive involvement of all authors in the analysis and  
35 interpretation of findings/results. Co-authors read the summaries of interviews and looked  
36 at some 'raw' transcripts to validate emerging themes and had several meetings, including  
37 two separate 2-day data analysis workshops to collectively undertake the analysis to ensure  
38 its reliability. Initial codes were grouped together into categories that were then further  
39 transformed into major themes. Transcripts were not returned to participants for  
40 comments. However, our ethics protocols encouraged interviewees to raise questions and  
41  
42  
43  
44  
45  
46  
47  
48  
49  
50  
51  
52  
53

---

54 <sup>3</sup> A process where each transcript is first read through, then manually coded and repeated codes are  
55 categorised into themes

56 <sup>4</sup> Non-verbal communication such as quietly crying, sighs, eye-contact avoidance  
57

1  
2  
3 interviewers were careful to reflect back and summarize comments throughout the  
4 interview to ensure accuracy of interpretation.  
5

## 6 7 **Ethics**

8  
9 This study received ethical approval from the South African Medical Research Council  
10 (EC036112105).  
11

12  
13 Before each interview, the interviewers explained the purpose of the interview in detail and  
14 as far as possible ensured that participants understood what agreeing to participate in the  
15 study meant. Participants who agreed to participate signed a consent form. All participants  
16 were each given grocery shopping vouchers worth R100 (US\$7.48) to compensate them for  
17 their time.  
18  
19  
20  
21

## 22 23 **Results**

24  
25 Respondents were asked to describe in detail their decision-making about utilising the CSG,  
26 in particular, how they used it to meet children's needs and their experiences of accessing  
27 food in the context of receiving the grant. We have adapted Leroy et al's[22] framework  
28 (figure 2) to identify the main themes emanating from the data about the different  
29 strategies caregivers engaged in to ensure food security and their children's wellbeing  
30 through utilisation of the CSG. Using the adapted framework, we start off by presenting  
31 results related to: 1) Women's income control and agency; followed by 2) Household Food  
32 Security; then 3) Education: attendance at early child development (ECD) centres; and then  
33 while keeping with the theme on education and ECD centres, we present findings on Food  
34 served at ECD centres (4) . Where possible we contrast findings from the rural site with  
35 those of the urban setting.  
36  
37  
38  
39  
40  
41  
42  
43

### 44 45 **1. Women's income control and agency**

46  
47 Leroy et al's[22] framework conceptualises the placing of money in women's control as a  
48 form of empowerment which leads to the availability of income in the household which  
49 women generally use for the good of the entire household. In this study, many caregivers  
50 stated that they pooled the CSG with other sources of income in the household (including  
51 other grants) and spent it on the needs of the household, with children's needs being  
52 prioritised in many of the households. The bulk of the CSG went to needs related to direct  
53  
54  
55  
56  
57



1  
2  
3 food and school-related costs, though some was spent on household needs like utilities  
4 (electricity), toiletries and transport for job-seeking or health-care.  
5

6  
7 *"... as I'm not working, sometimes I use the grant that my child gets to meet some of my*  
8 *needs like toiletries for myself and then I also use it for my child's needs as well. When I go*  
9 *looking for a job I use some of the grant and I also use it for my child's little things like lunch*  
10 *box things...because even the person I cohabit with is unemployed so I use that money... the*  
11 *grant... I buy electricity using the grant"* (CSG Recipient, Langa)  
12  
13  
14  
15

16 Different motivations and priorities informed the specific decisions caregivers made about  
17 what food to buy and what to feed their children. Sometimes these decisions were based on  
18 something as simple as wanting to make their children happy, even if this meant buying  
19 foods that were not deemed healthy. In other instances it was the caregiver's support  
20 system that influenced what food the children ate. Often it was the presence of a  
21 grandmother in the household who either worked or received their own old age pension,  
22 which allowed children to have access to foods that they would otherwise not have.  
23  
24  
25  
26  
27

28  
29 *And then I also buy chips... things that will make them happy; [such as] yoghurts.....I buy a*  
30 *bag...of fifty [chips a month]."* (CSG Recipient, Langa)  
31  
32

33 *...on Mondays she doesn't usually have fruit because perhaps... there's usually none here at*  
34 *home. Then I know on Thursday there's no way there would not be [fruit]. On weekends she*  
35 *has plenty [of fruit] because it's always available on weekends. Because when my mother*  
36 *goes to work on Mondays, Wednesdays and Fridays, she brings back fruit for her. (CSG*  
37 *Recipient, Langa)*  
38  
39  
40  
41

42 *He likes eating yoghurt and she buys him Fritos chips, sometimes she also buys him Nik Naks,*  
43 *sometimes she buys him Kinderjoy (chocolate).... He eats them maybe 3 times a week*  
44 *because his grandmother buys them when she gets back from work (CSG Recipient, Langa)*  
45  
46  
47  
48  
49

50 Other times it was a combination of convenience, affordability and the perceived nutritious  
51 value of the food that influenced the choices caregivers made about what to feed their  
52 children.  
53  
54  
55  
56  
57

1  
2  
3 *“However, the best bet is to use Instant Porridge just like I do.....like my child leaves very*  
4 *early [for daycare], so I don’t have time to stand over the stove to cook very early in the*  
5 *morning whilst the transport is hooting outside, so Instant is very good for that.... I can also*  
6 *say morvite is far better than any other porridge, it has vitamins.....one has to be clever*  
7 *about what you feed the child, because things like meat are very expensive, we only eat it on*  
8 *Sundays.....” (CSG Recipient, FGD2, Langa)*

9  
10  
11  
12  
13  
14 *Yes I’ve been feeding him anything that I think is good for him, like if it’s something like veg*  
15 *then I knew that I must grind it and then he will eat it (CSG Recipient, Mt Frere)*

16  
17  
18 Respondents complained that the CSG by itself was ‘too small’ to feed their children and  
19 meet their other many needs within households with many competing demands on money.

20  
21  
22 *They get money for clothing from this [CSG] money, on the other hand there is debt for food,*  
23 *then its school stuff, you see, others let’s say they go to school here in the location, others*  
24 *they use transport, all from the same money, [and even if there is] maybe another source of*  
25 *income, let’s say money from being a domestic worker, maybe they work a few days maybe*  
26 *two, and you find that it is not only this caregiver in the household, maybe there are four*  
27 *people here at the house and children, but this money is too little to be enough for here in*  
28 *the house you see, so its like that, then you are forced to make debt (CSG Recipient, FGD3,*  
29 *Langa)*

30  
31  
32 Respondents specifically identified food as the main reason for taking out loans.

33  
34  
35  
36  
37  
38  
39 *It is mostly debt for food...because there is that bread that they must have every day you*  
40 *have to buy it you see, no matter what bread has to be bought every day, even if there will*  
41 *be food there has to also be bread, even things to spread on the bread for the children, and*  
42 *porridges for the children everyday they have to have them, besides thinking “heee what is*  
43 *going to be eaten?” first thing when they wake up in the morning, there must be something*  
44 *to eat in the morning (CSG Recipient, FGD3, Langa)*

45  
46  
47  
48  
49  
50  
51  
52 Some respondents felt that there was an expectation from family and community members  
53 for the grant to be able to meet all of the needs of their children. One mother who had two  
54 children and was pregnant with another and lived with her parents and older siblings talked

1  
2  
3 about the pressure of needing to stockpile baby formula and other essentials in preparation  
4 for the unborn baby, in addition to meeting the needs of her existing children, so that she  
5 would not have to ask for help from her family whom she felt judged her spending of the  
6 grant:  
7  
8  
9

10 *I am trying to save all the time and I have to buy milk and put it aside, then I buy bottles and*  
11 *put them aside, because if I ask one of my family members to please buy me milk, then they*  
12 *will ask me if I do not get the grant for the children and what I do with the money, and yet*  
13 *the money that we get from grant does not do everything. Yes it does help out but it does*  
14 *not buy everything, then they will ask where the father of these children is and I know that*  
15 *the father needs work.*  
16  
17  
18  
19  
20

21 Despite the small value of the CSG, many caregivers acknowledged that it allowed them to  
22 have greater leverage both for accessing credit systems and informal reciprocal networks. In  
23 this way while the small value of the grant undermined women's agency on the one hand,  
24 on the other its very presence enabled women to leverage it to access and maximise their  
25 social capital. Access to credit systems and informal reciprocal networks enabled recipients  
26 to use the grant in a flexible manner. Sometimes this took the form of accessing food on  
27 credit at informal outlets (spaza shops) when they ran out of food halfway through the  
28 month:  
29  
30  
31  
32  
33  
34

35 *"[at the Somalians<sup>5</sup>] ... when I run out I can go back to them and ask for them to give me a*  
36 *2kg or a 1kg....on credit of course. When I get paid I pay them back....[I]pay for all the things*  
37 *I've taken during the month. I take the R350 hamper, when it is finished I go again.....they*  
38 *also know that on the 1<sup>st</sup>, M\*\*\* will pay them"* (CSG recipient, Langa)  
39  
40  
41  
42

43 Similarly, the CSG allowed caregivers to borrow from their neighbours in times of need,  
44 knowing that they would be able to repay them with the next grant pay out. In both the  
45 rural and urban study sites borrowing could be in the form of cash or food, or swapping  
46 food items. In all instances, including borrowing from a neighbour and relatives, mothers  
47 emphasised that whatever was borrowed had to be repaid at the beginning of the new  
48 month when people received their grants:  
49  
50  
51  
52  
53  
54

55  
56  
57 <sup>5</sup> The term "Somalians" refers to spaza shop owners who are Somalian foreign nationals

1  
2  
3 *"We ask around in the village, maybe someone you know, like a neighbour. You say "Can*  
4 *you please give me some maize meal", you know that you are going to mix that with*  
5 *whatever you have in the house, maybe next time she will also need the same from you...we*  
6 *swap items -maybe you have mealie-meal or potatoes and maybe that is just what she*  
7 *needs"(CSG recipient, Mt Frere)*

8  
9  
10  
11  
12 *"...[if you borrow] yes you must reimburse them. Even when you buy [your own] 12,5 kg (of*  
13 *mealie-meal) you have to pay the person back for their mealie meal...yes, indeed no one*  
14 *works for anybody else.... That is compulsory. Even now, I had borrowed some mealie meal*  
15 *from someone, I returned it in the morning" (CSG Recipient, Mt Frere)*

16  
17  
18  
19  
20 In summary, in this study, true to the framework, access to the CSG seemed to increase  
21 women's income control and agency. However, teasing out the particular ways in which this  
22 small cash transfer, often introduced in contexts of dire poverty and deprivation, linked to  
23 women's agency proved complex and messy. The extent to which women's income control  
24 of the grant translated to agency and influenced decision making around food was mediated  
25 -and sometimes limited -by a number of factors including: caregivers' relationships and  
26 social networks, caregivers' perceptions of what their children needed, the value of the  
27 grant, and coping strategies.

## 2. Household Food Security

28  
29  
30  
31  
32  
33  
34  
35  
36  
37 Mothers of CSG recipients provided detailed information about their spending of the CSG on  
38 food. Most primary caregivers in the study detailed feeding patterns that showed diets that  
39 were mostly starchy and sugary, with very little protein, vegetables, fruit and dairy. Mothers  
40 explained this as being a result of not having enough money.

41  
42  
43 *"They [children] eat whatever is in front of them. Porridge, rice, potatoes as well. Milk no,*  
44 *they only get it when I have money, then I'll buy them then...right now they drink Rooibos*  
45 *[tea]" (CSG recipient, Langa)*

46  
47  
48  
49  
50  
51 *"I don't buy meat regularly.. I buy it on the day we get the grant or sometimes after weeks, I*  
52 *mean it is not something common that we eat meat...." (CSG recipient, Mt Frere)*

1  
2  
3 Some food items, like sugar, though unhealthy, were regarded as highly valuable, as they  
4 made basic (typically plain) food, such as maize meal (pap) or soft porridge, palatable. The  
5 importance of sugar came out particularly strongly in the rural site.  
6  
7

8  
9 *“.....you must always have some sugar, we need to have sugar because when there is  
10 nothing else you can always just make pap and tea and the kids could just eat that and go to  
11 bed, they do not have a problem” (CSG recipient, Mt Frere)*  
12  
13

14 Households experienced regular food shortages and food often ran out before the end of  
15 the month. Caregivers demonstrated resilience and resourcefulness when they ran out of  
16 food, and would often have to go to extraordinary lengths to obtain food for their children.  
17 Sometimes this meant leaving very young children in the care of their siblings to walk for  
18 miles to get food from relatives.  
19  
20  
21  
22

23  
24 *“What I usually do when there is no food is to wash and leave this [15 month old] child with  
25 the younger children and then I walk to eNcinteni... I go to my sisters in-law -my husband’s  
26 brothers’ wives and come back with things I can cook for the kids, like potatoes, then I make  
27 the fire outside in the three-legged pot and I cook for my children and they go to bed having  
28 eaten” (CSG recipient, Mt Frere)*  
29  
30  
31  
32

33 Extreme levels of food insecurity in some households led caregivers to significantly change  
34 their diets; to sacrifice their share of meals and to dilute food in order to make it go further  
35 and spread it among more children in the household. Baked food items and using products  
36 from farmed animals were other common strategies, in the rural site.  
37  
38  
39

40  
41 *“when there is no money we often go to bed on pap and tea. We go to bed like that...when I  
42 was working we would have pap and meat and potatoes, we had good zishebo<sup>6</sup>. Now it is  
43 difficult for us, we eat whatever is available...then sometimes I make homemade bread and  
44 we eat that with tea, ... –we do all of this to make sure that we do not run out of food  
45 quickly.....we must make sure that the food only runs out when it’s close to month end” (CSG  
46 recipient, Mt Frere)*  
47  
48  
49  
50

51  
52 *“I sometimes try the [Maas] that’s sold [in shops], but I myself cannot eat it, even though it’s  
53 my favourite. I cannot eat it because, even [my youngest] and the others eat it. You realise  
54*  
55

---

56 <sup>6</sup> Relish used to accompany a starch dish  
57

1  
2  
3 *that if you buy a 2 litre or a 5 litre [Maas], I think: "If I make pap and maas for myself as well,*  
4 *this maas will get finished quickly.... but it's supposed to last a few days [at least]." [So]*  
5 *perhaps I take...I take some spinach and cook that [for myself] ... or I make sugar water, and*  
6 *I sleep having eaten" (CSG Recipient, Mt Frere)*  
7  
8  
9

10 For children under 2 years old who were still thought to need formula milk, periods of food  
11 insecurity meant cutting out formula milk altogether, diluting it, reducing the frequency of  
12 bottle feeding or supplementing with cheap dairy products such as Maas (sour milk), a  
13 popular meal in Black African households.  
14  
15

16  
17  
18 *"[In her case A\*\*] stopped having baby formula prematurely, because there was no*  
19 *money...the formula would get finished, you would see that [the formula]..that thickness is*  
20 *going down. While the child would be growing and needing more of it, it would be going*  
21 *down. So she would be eating formula which is more watery....So I got her used to my*  
22 *making sorghum porridge for her....Then I would take the baby formula, make it and pour it*  
23 *in here [with the porridge] so that she can eat something with milk in it." (CSG recipient, Mt*  
24 *Frere)*  
25  
26  
27  
28  
29

30  
31 *"... since he's older now, it [formula] lasts two weeks... Now, I normally feed him that in the*  
32 *morning... and then again in the evening; ... During the day... I may give him even a lump of*  
33 *pap. Now I even buy Maas for him, I even buy Maas for him and then mix it with pap for him*  
34 *in the evening..... [the formula] lasts... three weeks because I would carefully plan its use."*  
35  
36  
37 *(CSG Recipient, Langa)*  
38  
39  
40  
41

42 A number of respondents shared stories of extreme hardship as they negotiated their day to  
43 day lives and tried to provide food for their children with cash transfers as the only source of  
44 income in households where adults were either all unemployed or had precarious  
45 intermittent work. Caregivers shared stories about how they 'made a plan', in very dire  
46 circumstances, to ensure that their children had food and other needs met.  
47  
48  
49

50  
51 *"You know when you're a woman, you make a plan. Mmm, to be a woman is to make a*  
52 *plan"(CSG recipient, Mt Frere)*  
53  
54  
55  
56  
57  
58  
59  
60

1  
2  
3 *“...when you milk the goats; if you’re going to feed [the milk] to her – before the milk curdles*  
4 *– you filter it...you cook it until it boils, then you put it into a flask. It’s very nourishing. You*  
5 *then take it and feed your infant. I mix it and mix it... so that the infant can finish that pap-*  
6 *like thing. And when her stomach is semi-full, I then take the baby bottle **and feed [her],***  
7 *then she sleeps...” (CSG recipient, Mt Frere)*

8  
9  
10  
11  
12 In the few households where the CSG was not the sole source of income, particularly in  
13 households where either the caregiver worked or another close member of the household  
14 was employed, the child’s diet was markedly different, with more variation and choice.  
15 Notably, in both instances where this was the case the respondents were from the urban  
16 site, Langa.

17  
18  
19  
20  
21 *She wakes up and eats porridge. Like... she prefers Kellogg’s; the one that’s*  
22 *porridge...Sometimes, though, it might be Weetbix. Or it might be... this thing... what’s that*  
23 *thing? That thing that’s like tasty wheat, but it’s also like...it’s similar to oats, but it’s also*  
24 *instant [porridge]. Those are the things that she prefers, which I make for her in the*  
25 *morning....[with] her milk...Nido; the 3 years+...(CSG Recipient, Langa)I buy sugar..., 5 kg..., I*  
26 *buy rice..., 5 kg..., I buy mielie meal, 5 kg..., I buy Milo®; because they love Milo® .....So... in*  
27 *the morning they eat porridge and milk. I buy the milk in those 6 packs. It lasts half a*  
28 *month..... and meat...: mince meat, burger [patties], chicken, [and] viennas for sandwiches*  
29 *for when they go to school. And cheese..., and tomatoes, and... fruit. All types of fruit: apples,*  
30 *bananas, nectarines... I also buy potatoes of course. And onions and tomatoes for cooking.*  
31 *And spices. (CSG Recipient, Langa)*

32  
33  
34  
35  
36  
37  
38  
39  
40  
41  
42  
43 In summary, while the CSG was an important source of income, enabling caregivers to  
44 secure food for their children, it did not prevent food insecurity nor did it enable diverse,  
45 nutritionally adequate diets: households experienced regular food shortages, and when  
46 there was food, the diets were often not nutritionally complete. During periods of shortage  
47 women engaged in different coping strategies to make food last longer. In households  
48 where the CSG was not the only source of income, diets were more varied.

### 3. Education: attendance at ECD centres

In Leroy et al's[22] framework education is one of the key interventions needed to improve child nutrition and wellbeing. About 90% of the primary caregivers we interviewed had their children attending ECD centres, commonly referred to as crèches. Costs ranged from R50 to R300 a month, though the majority of children in this study attended centres charging at the lower end of this range. Some of the centres were registered while others were informal, but it was difficult to differentiate between them as primary caregivers themselves did not typically have this information. All the centres served food, with most children either receiving breakfast and lunch, or lunch only. A significant proportion of the CSG went towards crèche-related costs. In addition to direct fees this included, transport, lunchboxes and snacks, school bags, and in the case of Mt Frere, chairs to sit on.

*"Like... this one's [child support grant], I don't even touch it; it goes to the crèche. I pay for her crèche [with the money]. It's R230, yes, plus ... they must also pay for snacks." (CSG Recipient, Langa)*

*"[Crèche] is R180 [per month] this year, I don't know next year if it will still be the same....and then money for transport is R140 [per month]." (CSG Recipient, Langa)*

Caregivers went to great lengths to obtain relatively expensive food items such as juice (concentrate), fat spread, eggs, and snacks for their children to carry to school. This was the case even in the crèches that served food –caregivers still felt the need to send their children to school with a special packed lunch.

*"[the CSG] makes a difference. A small difference...but it makes one because, as I say to you, ...in the morning when they go to school I give them an egg... and chips, and bread, a slice of bread..."(CSG Recipient, Mt Frere)*

*"Then you have to try to get some juice, you have to try to get some Rama [margarine]... if you don't have eggs. [But] not the real Rama™, these lesser Rama's... you then spread, and spread, and spread [the Rama to make it go further], you put in the juice and the child leaves." (CSG Recipient, Mt Frere)*



1  
2  
3 In summary, attendance at ECDs was common among the children enrolled in the study and  
4 the costs associated therewith were high, often exceeding the value of the CSG.  
5  
6

#### 7 **4. Food served at ECD centres**

8

9 Even though all the crèches served food –as much as 2 meals a day in many centres -it was  
10 difficult to ascertain exactly what was served at the crèches. Many respondents could  
11 mention one or two items of food or meals that they thought their children were eating but  
12 had no detailed information of the food served for breakfast and lunch in a five day week.  
13  
14

15  
16  
17 *“I don’t know what mine is fed, I can’t lie, my child at one stage was fed Saldahna [tinned*  
18 *fish]...”(CSG Recipient, FGD4)*  
19

20  
21  
22  
23 *“There is usually breakfast...porridge... they said it is porridge....Or otherwise, there is also a*  
24 *Morvite<sup>7</sup> day. I’m not sure [what else] now.” (CSG Recipient, Langa)*  
25

26  
27 Some caregivers felt that the food served at crèches was not enough, and that this was the  
28 reason they felt it necessary to send their children with additional food, and why they had  
29 to have something ready for them to eat in the afternoon after crèche. It was not possible  
30 to accurately measure this since many respondents were not clear about what was served  
31 at creches or the portion sizes. Some caregivers did however observe that their children  
32 often came back from crèche thirsty and hungry.  
33  
34

35  
36  
37  
38 *“They get food from the school....No, it’s not enough of course. These are people who, as*  
39 *they come in, because they’re children, they say: “We’re thirsty, may we please have juice.*  
40 *We’re hungry... and so on” (CSG recipient, Mt Frere)*  
41  
42

43  
44 *[they are served] rice, Saldahna (tinned fish), but it’s always a mixture of the two, sometimes*  
45 *its Soya, but where my child is schooling there are tinned Saldahna that are packed to the*  
46 *rafters, so I assumed that only a mixture of this Saldahna and rice is prepared and given to*  
47 *children (P2, CSG FGD2, Langa)*  
48  
49

50  
51 *I felt that at school the food is not good at all. Some people preparing food at these creches*  
52 *aren’t trained at all and they aren’t careful with what they supply children at school with.*  
53  
54

55  
56  
57 

---

<sup>7</sup> Sorghum sweetened instant porridge

1  
2  
3 *My child doesn't eat at school anymore she carries her food from home (P3, CSG FGD2,*  
4 *Langa)*

5  
6  
7 In summary, all the ECDs served meals, however caregivers were not clear about what they  
8 were served, nor were they satisfied that their children were receiving enough food at the  
9 crèches.  
10  
11  
12  
13  
14  
15  
16  
17  
18  
19

## 20 **Discussion**

21  
22 This study contributes to the current relatively small evidence base of qualitative studies  
23 that seek to understand how cash transfers in low and middle income settings play a role in  
24 child nutrition and wellbeing. Since this is a qualitative inquiry, findings cannot be  
25 generalised outside the study sites where the research was conducted. However, inferences  
26 can be drawn to broaden our understanding of how cash transfers affect child nutrition and  
27 wellbeing in low and middle income settings.  
28  
29  
30  
31  
32

33 Despite the original focus of the CSG on providing nutrition support to children in poor  
34 households, it is well known from literature that it takes many different inputs in addition to  
35 food to achieve good nutrition and general child wellbeing. Findings from this paper show  
36 how the various needs that children and households have, affect the strategies used and  
37 trade-offs made by caregivers in the utilisation of CSG.  
38  
39  
40  
41

42 Our results support evidence reported by others which demonstrate that while the CSG is  
43 an important nutrition-sensitive intervention, malnutrition is complex, and requires a  
44 coordinated package of nutrition specific and nutrition sensitive interventions[7]. Moreover,  
45 on its own, the CSG is clearly a small amount of money and therefore, irrespective of the  
46 multiple uses it is put to, has limited ability to provide even adequate quality nutritious food  
47 for a child. In the context of rising food prices as observed in 2016, even if the CSG was  
48 spent exclusively on nutritious food for beneficiaries alone, at its 2016 value (R350) it would  
49 “cover less than two-thirds of the minimum food needs of a young child (63%) or an older  
50 child (58%)”[7]. The Pietermaritzburg Agency for Community Social Action (PACSA) Food  
51  
52  
53  
54  
55  
56  
57  
58  
59  
60

1  
2  
3 Price Barometer for September 2016 calculated that the cost of a basic but nutritious food  
4 basket for a young child was R537.48 per month, way above the R350 value of the CSG at  
5 the time[24]. The CSG is not only small, it is also diluted among “multiple users and multiple  
6 uses”[7, 18] as shown in this study. It can be argued that in a context of widespread poverty  
7 and high unemployment rates, it is impractical and unethical to expect caregivers to ring-  
8 fence expenditure of the CSG on child beneficiaries only.  
9  
10  
11  
12

13  
14 The findings from this study confirmed Leroy et al’s framework[22], that increasing women’s  
15 income control facilitated attempts to mitigate food insecurity. Giving cash to women gave  
16 them control over a portion of the household income that only they had a say in how it  
17 should be spent. As reported in other studies[25, 26] placing the CSG in the hands of women  
18 allowed them to leverage it to access reciprocal networks in the form of neighbours,  
19 relatives and access to informal credit when food ran out. The findings from this study  
20 indicate that these systems of reciprocity were intricate and elaborate mechanisms and  
21 were crucial life lines for communities with few other margins. At every turn caregivers  
22 struggled: with food insecurity, where children had poor diets and mothers had to employ  
23 different strategies to ensure that there was food; in care practices, where the inadequacy  
24 of the grant made basics like soap a precious commodity; in accessing ECD services, where  
25 costs included fees, transport, lunchboxes and even in some cases, furniture and  
26 equipment.  
27  
28  
29  
30  
31  
32  
33  
34  
35  
36

37 Interventions such as ECD centres in South Africa hold a lot of promise in helping to meet  
38 the food needs of children from poor households. Ruel et al[6] emphasise the importance  
39 of ECD interventions with or without a nutrition component in tackling malnutrition. In  
40 South Africa the ECD programme has a nutrition component, and as shown in this study it  
41 potentially makes up a significant amount of a child’s daily food intake. However, it is not  
42 well researched in terms of dietary quality and adequacy. Significantly however, though  
43 mothers prioritised early childhood education, it is important to note that it is not free. As  
44 indicated, the direct and indirect costs associated with attendance at ECD centres, took up  
45 the whole grant in some households.  
46  
47  
48  
49  
50  
51  
52

53 Taken together, our findings show that in the context of a non-comprehensive social  
54 security system caregivers constantly made trade-offs to meet essential needs –food vs  
55 education vs care practices. There was no evidence of misuse. Instead, in the context of  
56  
57  
58  
59  
60

1  
2  
3 fundamental, pressing and competing needs, rational decisions were made about how to  
4 spend this small cash transfer. Evidence from studies that have interrogated the relationship  
5 between the CSG and misuse and perverse incentives refutes such claims[27-29].  
6  
7

8  
9 In their working paper on food security and social grants published in 2017, Devereux and  
10 Waidler[7] point out that while social grants in South Africa are an important source of  
11 income for poor households, the amounts they transfer to households need to rise and  
12 should be linked to the amount of money needed to buy a nutritious food basket. The  
13 authors further recommend that social protection provision should be framed within “cash  
14 plus” models that are linked to broader non-cash services and inputs such as health,  
15 education, social services and sanitation and the promotion of appropriate nutrition and  
16 hygiene practices. Current interest in “cash plus” models arises out of the growing  
17 recognition that it takes more than cash or a narrow focus on food to improve child  
18 wellbeing[30]. In South Africa “plus” components such as free education or subsidised ECD  
19 services are in place, but as this paper has shown, access is often inequitable and still comes  
20 with hidden costs.  
21  
22  
23  
24  
25  
26  
27  
28  
29  
30  
31

### 32 **Conclusion**

33  
34 This study has demonstrated that caregivers make rational decisions and employ different  
35 strategies that ultimately serve –even if in a small, limited way -the actual goals of the CSG:  
36 child wellbeing and nutrition. The recent public furore around threats to the disbursements  
37 of social grants in South Africa was proof once again of how indispensable cash transfers  
38 such as the CSG have become to the survival of households in South Africa. It is indisputable  
39 that the CSG plays an important role in childhood poverty alleviation efforts in South Africa.  
40 However it is not a panacea. This paper has presented results which confirm previous  
41 findings about the inadequacy of the CSG to meet its goal of providing support for nutrition.  
42 However, in a context of high unemployment rates, soaring food prices, rising cost of living  
43 and the lack of coordination between other nutrition-sensitive and nutrition-specific  
44 interventions, their efforts were undermined by a cash transfer that was too small in value  
45 to make a meaningful difference to child nutrition. Thus, while the CSG is important, much  
46 more emphasis should be placed on parallel structural solutions that are important in  
47  
48  
49  
50  
51  
52  
53  
54  
55  
56  
57  
58  
59  
60

1  
2  
3 ensuring good nutrition outcomes and wellbeing. These would include access to free, quality  
4 ECD services that provide adequate nutritious meals, access to basic services that impact on  
5 nutritional outcomes such as housing with adequate water and sanitation services, and the  
6 promotion of appropriate feeding, hygiene and care practices. Such measures would form  
7 part of a coordinated response to improve child wellbeing, consisting of a package of  
8 nutrition sensitive and nutrition specific interventions, in addition to raising the value of the  
9 CSG, and creating a comprehensive social security system in South Africa that provides for  
10 people through the life course.  
11

12  
13  
14  
15  
16  
17 Further research, both qualitative and quantitative, is needed to understand how nutrition-  
18 sensitive non-food inputs such as ECD services and care arrangements work to impact on  
19 child nutrition and wellbeing within a “cash plus” framework.  
20  
21  
22  
23  
24  
25  
26  
27  
28  
29  
30  
31  
32  
33  
34  
35  
36  
37  
38  
39  
40  
41  
42  
43  
44  
45  
46  
47  
48  
49  
50  
51  
52  
53  
54  
55  
56  
57  
58  
59  
60

## References

1. Hendriks, S., *Food security in South Africa: Status quo and policy imperatives*. Agrekon, (2014). **53**((2)): p. 1-24.
2. Ruel, M., Hoddinott, J., *Investing in early childhood nutrition*. 2008, IFPRI: Washington DC.
3. Case, A., Paxson, C., , *Causes and Consequences of Early Life Health*, in *NBER Working Paper Series no. 15637.*, M.N.B.o.E.R. Cambridge, Editor. 2010.
4. May, J., and Timæus, I.,, *Inequities in under-five nutritional status in South Africa: what progress has been made?* Development Southern Africa 2014. **31**((6)): p. 761-774.
5. Children, S.t., *Unequal portions - ending malnutrition for every last child*, S.t. Children, Editor. (2016), Save the Children Fund: London
6. Ruel, M., Alderman, H. , *Nutrition-sensitive interventions and programmes: how can they help to accelerate progress in improving maternal and child nutrition?* Lancet 2013. **382**: p. 536-51.
7. Devereux, S., Waidler, J. , “*Why does malnutrition persist in South Africa despite social grants?*” in *Food Security SA Working Paper Series No.001.* , D.-N.C.o.E.i.F. Security, Editor. (2017): South Africa.
8. May, J., *Why child malnutrition is still a problem in South Africa 22 years into democracy*, in *Health and Medicine*, C. Bailey, Editor. 2016, The Conversation: South Africa.
9. Hall, K., Sambu, W., Berry L., Giese, S., Almeleh, and S. C. and Rosa, *South African Early Childhood Review 2016*. South African Early Childhood Review 2016, ed. A. Delany, Jehoma, S., Lake, L (eds.). (2016), Cape Town: Children’s Institute, University of Cape Town and Ilifa Labantwana.
10. StatsSA, *South Africa Demographic Health Survey 2016: Key Indicators Report 2017*, Statistics South Africa Pretoria.
11. Bastagali, F., et al., *Cash transfers: what does the evidence say? A rigorous review of programme impact and of the role of design and implementation features*. 2016, Overseas Development Institute: London.

12. Manley, J., S. Gitter, and V. Slavchøvska, *How effective are cash transfer programmes at improving nutritional status: A rapid assessment of programmes' effects on anthropometric outcomes*. 2012, EPPI-Centre, Social Science Research Unit, Institute of Education, University of London: London.
13. Lund, F., *Changing Social Policy*. 2007, Cape Town: HSRC Press.
14. Agüero, J.M., M.R. Carter, and I. Woolard, *The Impact of Unconditional Cash Transfers on Nutrition: the South African Child Support Grant*. 2006., Centre for Global Development:  
<http://www.cgdev.org/doc/events/11.07.06/unconditional%20cash%20transfers.pdf>
15. Samson, M., Lee, U., Ndlebe, A., Mac Quene, K., van Niekerk, I., Gandhi, V., Harigaya, T., Abrahams, C., *The Social and Economic Impact of South Africa's Social Security System*. 2004, Commissioned by the Directorate: Finance and Economics, Department of Social Development: Pretoria.
16. Pienaar P.L. & Von Fintel D.P, *Hunger in the former apartheid homelands: Determinants of converging food security 100 years after the 1913 Land Act.*, in *Stellenbosch Economic Working Papers 26/2013*, U.o. Stellenbosch, Editor. 2013: Cape Town.
17. Battersby, J., *The State of Urban Food Insecurity in Cape Town.*, in *Urban Food Security Series* (2011), Queen's University and AFSUN: Kingston and Cape Town.
18. Coetzee, M., *Finding the Benefits: Estimating the Impact of the South African Child Support Grant.* South African Journal of Economics, (2013). **81**((3)): p. 427-450.
19. Mpike, M., Wright, G., Rohrs, S., Mohamed, Z., Mzankomo, L. , *Common concerns and misconceptions: what does the evidence say?*, in *South African Child Gauge 2016*, A. Delany, Jehoma, S., Lake, L (eds.), Editor. 2016, University of Cape Town: Cape Town. p. 55-59.
20. Fraser, N., Gordon, L., , *A Genealogy of Dependency: Tracing a Keyword of the U.S Welfare State*. The University of Chicago Press. , (1994) **Vol. 19**(No. 2): p. pp 309-336.
21. Mead L., *The New Politics of Poverty: The Non-working Poor in America*. (1992), US: Basic Books.

- 1  
2  
3 22. Leroy, J., M. Ruel, and E. Verhofstadt, *The impact of conditional cash transfer*  
4 *programmes on child nutrition: a review of evidence using a programme theory*  
5 *framework*. Journal of Development Effectiveness, 2009. **1**(2): p. 103-129.  
6  
7  
8 23. Graneheim, U., Lundman, B. , *Qualitative content analysis in nursing research:*  
9 *concepts, procedures and measures to achieve trustworthiness*. Nurse Education  
10 Today, 2004. **24**: p. 105-112  
11  
12  
13 24. Smith, J., Abrahams, M., , *2016 PACSA Food Price Barometer Annual Report 2016*,  
14 Pietermaritzburg Agency for Community Social Action: Pietermaritzburg.  
15  
16 25. du Toit, A., Neves, D. , *Informal Social Protection in Post-Apartheid Migrant*  
17 *Networks: Vulnerability, Social Networks and Reciprocal Exchange in the Eastern and*  
18 *Western Cape, South Africa*. 2009, Brooks World Poverty Institute.  
19 [www.manchester.ac.uk/bwpi](http://www.manchester.ac.uk/bwpi).  
20  
21  
22  
23 26. Zembe-Mkabile, W., Surender, R., Sanders, D., Jackson, D., Doherty, T.,, *The*  
24 *experience of cash transfers in alleviating childhood poverty in South Africa: mothers'*  
25 *experiences of the Child Support Grant*. Glob Public Health, 2015. **10**(7): p. 834-51.  
26  
27  
28 27. Makiwane, M., Udjo, E., *No proof of 'child farming' in awarding of child support*  
29 *grants*. . Human Science Research Council Review, 2007. **5**(1): p. pp.6-7.  
30  
31  
32 28. Makiwane, M., *The Child Support Grant and Teenage Childbearing in South Africa*.  
33 *Development Southern Africa*, 2010. **27**(2): p. 193 - 204.  
34  
35 29. Surender, R., Noble, M., Wright, G., Ntshongwana, P. , *Social Assistance and*  
36 *Dependency in South Africa: An Analysis of Attitudes to Paid Work and Social Grants*.  
37 *Journal of Social Policy*, 2010. **39**(2): p. 203-221.  
38  
39  
40 30. Roelen, K., Delap, E., Jones, C., Karki Chettri, H., *Improving child wellbeing and care in*  
41 *Sub-Saharan Africa: The role of social protection*. Children and Youth Services  
42 Review, 2017. **73**: p. 309-318.  
43  
44  
45  
46  
47  
48  
49  
50  
51  
52  
53  
54  
55  
56  
57  
58  
59  
60



1  
2  
3  
4  
5 **Figure 1: Mechanisms by which cash transfer programs might affect child nutrition.**

6 **Source: Leroy, J., Ruel, M., Verhofstadt, E., 2009. The impact of conditional cash transfer**  
7 **programmes on child nutrition: a review of evidence using a programme theory**  
8 **framework. J. Dev. Eff. 1, 103–129.**  
9  
10  
11  
12  
13  
14  
15  
16

17 **Figure 2: Adapted conceptual framework for study findings**  
18  
19  
20  
21  
22  
23  
24  
25  
26  
27  
28  
29  
30  
31  
32  
33  
34  
35  
36  
37  
38  
39  
40  
41  
42  
43  
44  
45  
46  
47  
48  
49  
50  
51  
52  
53  
54  
55  
56  
57  
58  
59  
60

**Table 1: Profile of participants included in individual interviews (n=40)**

|                                                           | <b>Mount Frere<br/>(n=20)</b>              | <b>Langa (n=20)</b>                  |
|-----------------------------------------------------------|--------------------------------------------|--------------------------------------|
| <b>Household size range</b>                               | <b>2-6</b>                                 | <b>2-14</b>                          |
| <b>Average household size</b>                             | <b>4.3</b>                                 | <b>5.6</b>                           |
| <b>Age range of caregivers</b>                            | <b>18-70</b>                               | <b>18-65</b>                         |
| <b>Number of CSGs per household (range)</b>               | <b>1-5</b>                                 | <b>1-7</b>                           |
| <b>CSG caregivers in formal employment</b>                | <b>0</b>                                   | <b>3</b>                             |
| <b>Caregivers who have not completed secondary school</b> | <b>17</b>                                  | <b>6</b>                             |
| <b>Caregivers who have completed secondary school</b>     | <b>3</b>                                   | <b>14</b>                            |
| <b>Relationship of caregiver to child</b>                 | <b>Mother (n=13)<br/>Grandmother (n=7)</b> | <b>Mother (n=18)<br/>Grandmother</b> |

|  |  |              |
|--|--|--------------|
|  |  | <b>(n=2)</b> |
|--|--|--------------|

For peer review only

1  
2  
3  
4  
5  
6  
7  
8  
9  
10  
11  
12  
13  
14  
15  
16  
17  
18  
19  
20  
21  
22  
23  
24  
25  
26  
27  
28  
29  
30  
31  
32  
33  
34  
35  
36  
37  
38  
39  
40  
41  
42  
43  
44  
45  
46  
47  
48  
49  
50  
51  
52  
53  
54  
55  
56  
57  
58  
59  
60

For peer review only

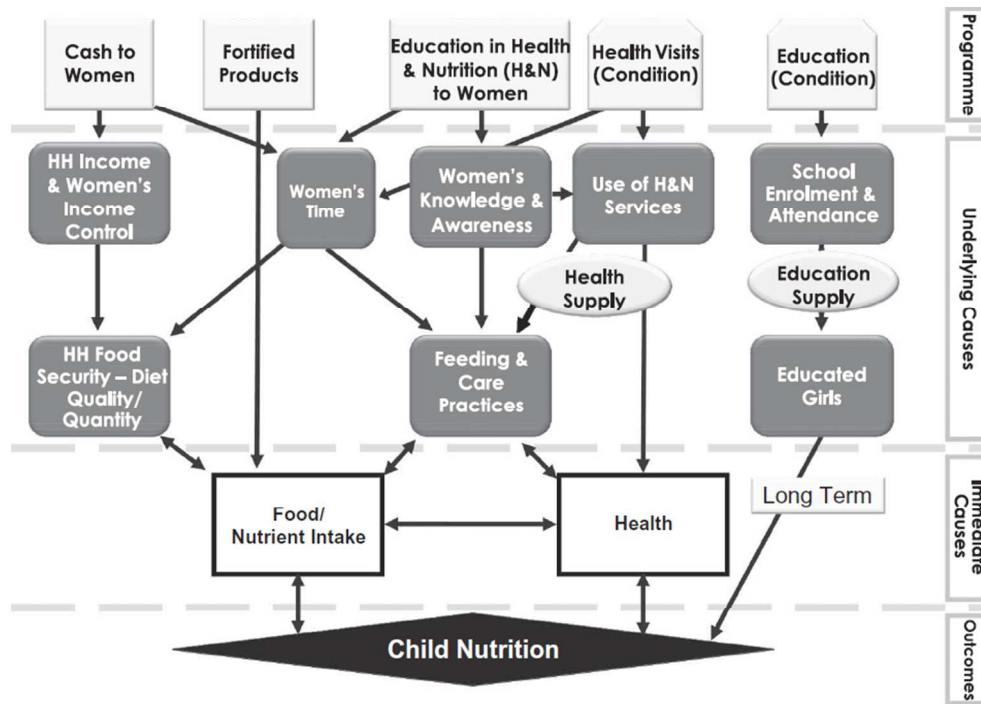

Figure 1: Mechanisms by which cash transfer programs might affect child nutrition. Source: Leroy, J., Ruel, M., Verhofstadt, E., 2009. The impact of conditional cash transfer programmes on child nutrition: a review of evidence using a programme theory framework. *J. Dev. Eff.* 1, 103-129.

256x179mm (96 x 96 DPI)

Figure 2: Adapted conceptual framework for study findings

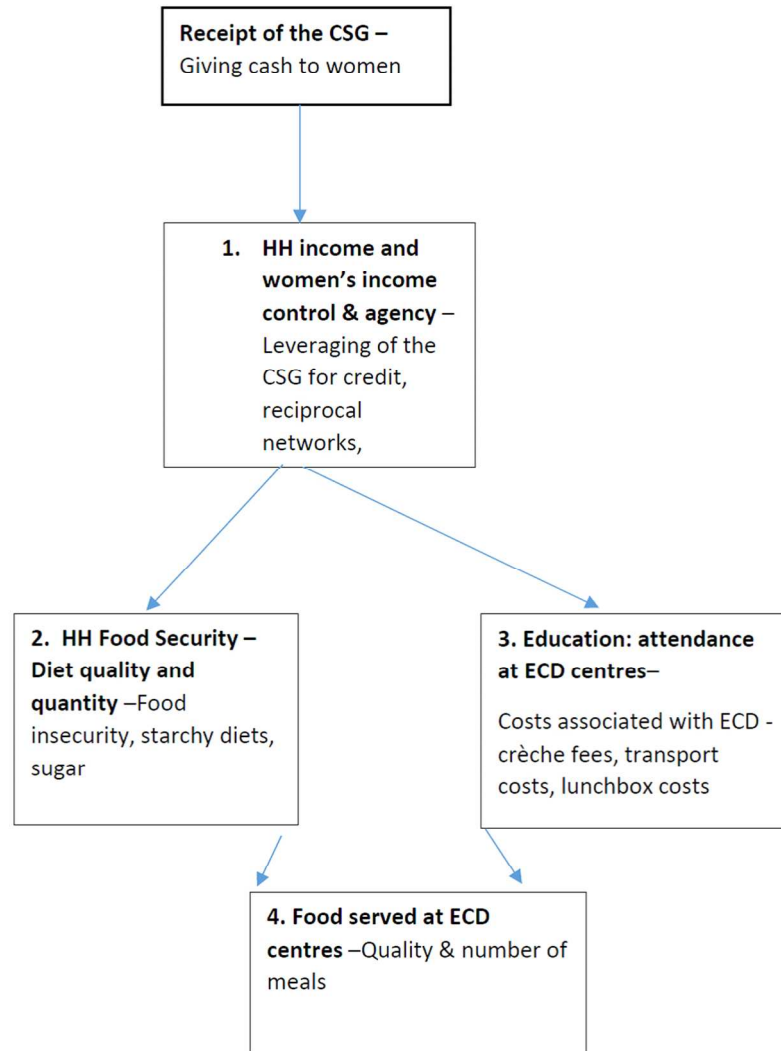

Adapted conceptual framework

320x380mm (96 x 96 DPI)

# BMJ Open

## **“To be a woman is to make a plan”: A qualitative study exploring mothers’ experiences of the Child Support Grant in supporting children’s diets and nutrition in South Africa**

|                                 |                                                                                                                                                                                                                                                                                                                                                                                                                                                                                                                                                                                                                                                                                                                                                                                                                                                                                                               |
|---------------------------------|---------------------------------------------------------------------------------------------------------------------------------------------------------------------------------------------------------------------------------------------------------------------------------------------------------------------------------------------------------------------------------------------------------------------------------------------------------------------------------------------------------------------------------------------------------------------------------------------------------------------------------------------------------------------------------------------------------------------------------------------------------------------------------------------------------------------------------------------------------------------------------------------------------------|
| Journal:                        | <i>BMJ Open</i>                                                                                                                                                                                                                                                                                                                                                                                                                                                                                                                                                                                                                                                                                                                                                                                                                                                                                               |
| Manuscript ID                   | bmjopen-2017-019376.R2                                                                                                                                                                                                                                                                                                                                                                                                                                                                                                                                                                                                                                                                                                                                                                                                                                                                                        |
| Article Type:                   | Research                                                                                                                                                                                                                                                                                                                                                                                                                                                                                                                                                                                                                                                                                                                                                                                                                                                                                                      |
| Date Submitted by the Author:   | 11-Mar-2018                                                                                                                                                                                                                                                                                                                                                                                                                                                                                                                                                                                                                                                                                                                                                                                                                                                                                                   |
| Complete List of Authors:       | Zembe-Mkabile, Wanga; Medical Research Council, Health Systems Research Unit; Southern African Social Policy Research Institute<br>Surrender, Rebecca; University of Oxford , Department of Social Policy and Intervention; Rhodes University, Institute of Social and Economic Research<br>Sanders, David; University of Western Cape, School of Public Health;<br>University of Cape Town, Department of Paediatrics and Child Health, Faculty of Health Sciences<br>Swart, Rina; University of the Western Cape, Department of Dietetics and Nutrition<br>Ramokolo, Vundli; Medical Research Council, Health Systems Research Unit<br>Wright, Gemma ; Southern African Social Policy Research Institute;<br>University of South Africa, Archie Mafeje Research Institute<br>Doherty, Tanya; Medical Research Council, Health Systems Research Unit;<br>University of Western Cape, School of Public Health |
| <b>Primary Subject Heading</b>: | Nutrition and metabolism                                                                                                                                                                                                                                                                                                                                                                                                                                                                                                                                                                                                                                                                                                                                                                                                                                                                                      |
| Secondary Subject Heading:      | Qualitative research, Nutrition and metabolism                                                                                                                                                                                                                                                                                                                                                                                                                                                                                                                                                                                                                                                                                                                                                                                                                                                                |
| Keywords:                       | cash transfers, food security, Community child health < PAEDIATRICS, child nutrition, south africa                                                                                                                                                                                                                                                                                                                                                                                                                                                                                                                                                                                                                                                                                                                                                                                                            |
|                                 |                                                                                                                                                                                                                                                                                                                                                                                                                                                                                                                                                                                                                                                                                                                                                                                                                                                                                                               |

SCHOLARONE™  
Manuscripts

1  
2  
3 **“To be a woman is to make a plan”**: A qualitative study exploring mothers’ experiences of  
4 **the Child Support Grant in supporting children’s diets and nutrition in South Africa**  
5  
6  
7

8  
9 **Wanga Zembe-Mkabile<sup>1,2</sup>, Rebecca Surender<sup>3,4</sup>, David Sanders<sup>5,6</sup>, Rina Swart<sup>7</sup>, Vundli**  
10 **Ramokolo<sup>1</sup>, Gemma Wright<sup>2,8</sup>, and Tanya Doherty<sup>1,5,9</sup>**  
11  
12

13 **Corresponding author:** Wanga Zembe-Mkabile  
14

15 Address: Medical Research Council of South Africa  
16

17 Francie van Zyl Dr  
18

19 Parow Valley  
20

21 Cape Town  
22

23 7500  
24

25 Email: wanga.zembe@mrc.ac.za; wanga.zembe@gtc.ox.ac.uk  
26

27 Tel: 0027 21 938 0447/Fax: 0027 21 938 0483  
28  
29  
30  
31  
32  
33

34 **Author affiliations and qualifications:**  
35

36 1. Dr Wanga Zembe-Mkabile  
37

38 Qualifications: MSc, DPhil Social Policy  
39

40 Affiliations:  
41

- 42 1. Health Systems Research Unit, South African Medical Research Council
- 43 2. Southern African Social Policy Research Institute

44 b. Prof Rebecca Surender  
45

46 Qualifications: MSc; DPhil Sociology  
47

48 Affiliation:  
49

- 50 3. Department of Social Policy and Intervention, University of Oxford
  - 51 4. Institute of Social & Economic Research, Rhodes University
- 52  
53  
54  
55  
56  
57



1  
2  
3  
4  
5  
6  
7  
8 c. Prof David Sanders

9  
10 Qualifications: MD, MRCP, DSc

11  
12 Affiliation:

13  
14 5. School of Public Health, University of the Western Cape

15  
16 6. Department of Paediatrics and Child Health, Faculty of Health Sciences, University of  
17  
18 Cape Town

19  
20 e. Prof Rina Swart

21  
22 Qualifications: MPhil (Public Health), PhD

23  
24 Affiliation:

25  
26 7 Department of Dietetics and Nutrition, University of the Western Cape

27  
28  
29 f. Ms Vundli Ramokolo

30  
31 Qualifications: MPH

32  
33 Affiliation:

34  
35  
36 1. South African Medical Research Council

37  
38 g. Prof Gemma Wright

39  
40 Qualifications: MSt, DPhil Social Policy

41  
42 Affiliation:

43  
44  
45 2. Southern African Social Policy Research Institute

46  
47 8 Archie Mafeje Research Institute, University of South Africa

48  
49 h. Prof Tanya Doherty

50  
51 Qualifications: MPH, PhD Public Health

52  
53 Affiliation:

54  
55  
56 1. Health Systems Research Unit, South African Medical Research Council

1  
2  
3 5. School of Public Health, University of the Western Cape  
4

5 9. School of Public Health, University of Witwatersrand  
6  
7  
8  
9

10 **Keywords:** child support grant, cash transfers; child wellbeing, food security, child nutrition  
11

### 12 **Acknowledgements** 13

14 This study was financially supported through the DST/NRF Centre of Excellence in Food  
15 Security. We thank the caregivers and their families for their contribution to this study. We  
16 also wish to thank Professor Stephen Devereux for reading the first draft of this manuscript  
17 and providing insightful comments that helped to strengthen it.  
18  
19  
20

### 21 **Contributorship Statement** 22

23 WZM, VR, TD, DS, RS, RS, GW conceptualised and designed the study. WZM and VR  
24 conducted the interviews. Data were coded and analysed by WZM, and the coding and  
25 analysis were checked by VR, TD, DS, RS, and RS. WZM wrote the first draft of the  
26 manuscript and thereafter all co-authors made inputs on all drafts of the manuscript.  
27  
28  
29  
30  
31

### 32 **Data Sharing Statement** 33

34 The study data comprises of audio recordings, transcripts, transcript summaries and coded  
35 analysis. The coded analysis is available for reviewers should they wish to access it. We are  
36 unable to make the audio recordings and transcripts available as we did not seek permission  
37 for this from participants at the start of the study when we collected data.  
38  
39  
40  
41  
42  
43

44 **Conflict of interest:** None to declare  
45  
46  
47  
48  
49  
50  
51  
52  
53  
54  
55  
56  
57  
58  
59  
60

1  
2  
3  
4  
5  
6  
7  
8  
9  
10  
11  
12  
13  
14  
15  
16  
17  
18  
19  
20  
21  
22  
23  
24  
25  
26  
27  
28  
29  
30  
31  
32  
33  
34  
35  
36  
37  
38  
39  
40  
41  
42  
43  
44  
45  
46  
47  
48  
49  
50  
51  
52  
53  
54  
55  
56  
57  
58  
59  
60

For peer review only

**Abstract**

Food security and good nutrition are key determinants of child wellbeing. There is strong evidence that cash transfers such as South Africa's Child Support Grant (CSG) have the potential to help address some of the underlying drivers of food insecurity and malnutrition by providing income to caregivers in poor households, but it is unclear how precisely they work to affect child wellbeing and nutrition. We present results from a qualitative study conducted to explore the role of the CSG in food security and child wellbeing in poor households in an urban and a rural setting in South Africa.

**Setting:** Mt Frere, Eastern Cape (rural area); Langa, Western Cape (urban township).

**Participants:** CSG recipient caregivers and community members in the two sites. We conducted a total of 40 in-depth interviews with mothers or primary caregivers in receipt of the CSG for children under the age of 5 years. In addition, 5 focus group discussions with approximately 8 members per group were conducted. Data were analysed using manifest and latent thematic content analysis methods.

**Results:** The CSG is too small on its own to improve child nutrition and wellbeing. Providing for children's diets and nutrition competes with other priorities that are equally important for child wellbeing and nutrition.

**Conclusions:** In addition to raising the value of the CSG so that it is linked to the cost of a nutritious basket of food, more emphasis should be placed on parallel structural solutions that are vital for good child nutrition outcomes and wellbeing, such as access to free quality early child development services that provide adequate nutritious meals, access to adequate basic services, and the promotion of appropriate feeding, hygiene and care practices.

Abstract word count =279

Manuscript word count excluding references= 7076

Figures: 1

Tables: 1

### Strengths and limitations of this study

- A methodological strength of this manuscript is that it utilises a qualitative research approach that combines in-depth individual interviews which give an individual-level experience of the Child Support Grant, as well as focus group discussions that give a community-level view of the topic under investigation
- A limitation of the study is that since this is a qualitative inquiry, findings cannot be generalised outside the study sites where the research was conducted. However, inferences can be drawn to broaden our understanding of how cash transfers affect child nutrition and wellbeing in low and middle income settings.

## Background

Food security and good nutrition are key determinants of child wellbeing[1, 2]. There is global consensus in the literature that health and nutritional status in early life have impacts that go beyond childhood, affecting human development and later life productivity. Poor child health outcomes such as undernutrition in the early years of life, especially the first 1000 days, have irreversible negative ripple effects on illness and disability, timing of entry into school, educational attainment, economic productivity, and ultimately, the transmission of poverty from generation to generation[2, 3]. Stunting -defined as height-for-age of <-2 z-scores below the median -is a measure of chronic inadequate dietary intake and reflects long term under-nutrition. While the evidence on levels of stunting in South Africa appears mixed, with some reporting a modest decline on the one extreme[4, 5], and others reporting increasing rates on the other[1], one fact remains clear; South Africa continues to experience stunting rates for children under 5 that are inconsistent with its standing as an upper middle-income country[6-8]. Different data sources on stunting report different rates for the period 1993-2012, as a result of using different sampling frames, sample sizes and age ranges of children measured, but whichever sources are used, the clear message is that stunting rates have at best moderately improved or at worst stagnated during this period – never going above 30% and never reducing below 20%[7]. In 1993 stunting rates for under 5s in South Africa were as high as 30%, in 2008 about 25% of children were reported to be stunted[6, 9], and in 2012 they were between 21.5% and 26.4%[1, 7]. The latest South African Demographic Health Survey (DHS) reports stunting at 27% for children under 5 in 2016[10].

There is a growing view among policymakers that cash transfers (CTs) have the potential to help address some of the underlying drivers of food insecurity and malnutrition by providing income to caregivers in poor households[3, 4]. As a result, CTs have become a policy instrument of choice for addressing a range of child health and development outcomes. Over 130 countries in the Global South have unconditional cash transfer (UCTs) programmes and about 63 have conditional cash transfer programmes[11]. However, specific evidence on child cash transfers and nutrition is mixed. In 2012 a rapid review of evidence on conditional and unconditional cash transfers in low and middle income countries found that overall they had no impact on child-height for age[12]. More recently, a rigorous review of

1  
2  
3 evidence on child cash transfers implemented in low and middle income settings found that  
4 only 5 out of 13 impact assessments reported statistically significant improvements in  
5 stunting[11]. Bastagali et al[11] suggest that the challenge to determining the impact of cash  
6 transfers on child growth measures is the fact that child growth is not influenced through  
7 income support alone.  
8  
9  
10

11  
12  
13  
14 In South Africa the Child Support Grant (CSG) was introduced in 1998 with the main aim of  
15 providing nutrition support for children living in poor households[13]. As the largest cash  
16 transfer programme in South Africa and the continent, reaching more than two thirds of all  
17 children in the country[8], the CSG is widely regarded as the most effective child poverty  
18 alleviation strategy in the country[9]. The cash transfer pays out R340<sup>1</sup> (US\$25.40) per  
19 month to any child whose parent/s earn less than 10 times the amount of the grant per  
20 month. The CSG is non-contributory and can be received by children from birth to 18 years.  
21 It has only one 'soft-condition'<sup>2</sup> for continued receipt: school attendance. Additionally, it has  
22 requirements attached to the application process such as the possession of an Identity  
23 Document by the mother (or primary caregiver) and of a birth certificate by the child.  
24  
25  
26  
27  
28  
29  
30  
31

32 Early research on the CSG indicated that the grant was associated with improved height-for-  
33 age growth for children under 3[14], and reduced hunger[15]. Recent research on the CSG  
34 suggests however that while it mitigates extreme poverty and hunger [9, 15, 16] it does not  
35 protect against food insecurity and malnutrition[7, 17, 18]. While this fact is increasingly  
36 accepted, there is little agreement about reasons for it. Media and some commentators  
37 have argued that the grant's lack of impact results from the fact that primary caregivers  
38 misuse it by spending it on alcohol or personal non-essentials, unrelated to the intended  
39 goals of the cash transfer programme, although these allegations have yet to be  
40 substantiated with rigorous evidence[19]. In contrast, others assert that these allegations  
41 are part of the historical pejorative discourse evident in both the Global South and North  
42 where 'welfare' recipients are perceived as lazy and irresponsible[20, 21].  
43  
44  
45  
46  
47  
48  
49  
50  
51

---

52  
53 <sup>1</sup> At the time of data collection

54 <sup>2</sup> This is a so-called "soft condition" because on paper it is said to not be a condition for continued receipt but  
55 rather a mechanism for identifying and providing support to children who are struggling to stay in school, but  
56 in practice when a CSG beneficiary drops out of school, they cease to receive the grant until they return to  
57 school.  
58

1  
2  
3 Recent analysis suggests that although the CSG may prevent further declines in child  
4 nutritional status, it fails to improve food security and child nutrition; not because it is  
5 misused but rather because it is small and diluted by “multiple uses and multiple users”[7].  
6 According to this evidence, the CSG is inevitably spent on several members of the household  
7 as well as the individual targeted beneficiary, and on needs other than food, reflecting the  
8 multiple elements necessary to ensure child well-being. In a related context, Leroy et al[22]  
9 provide a framework for the different inputs needed to make child cash transfers effective  
10 in improving child wellbeing and nutrition (Figure 1).  
11  
12  
13  
14  
15  
16  
17  
18

19 The Leroy et al[22] framework shows that giving cash transfers to women is one of 5  
20 interventions needed in a coordinated package for supporting child nutrition and wellbeing.  
21 Other interventions include food, education in health and nutrition, healthcare facility visits  
22 and education more generally. The framework underscores two important points; first, that  
23 giving cash to women (rather than a male household head) leads to an increase in  
24 household income and women’s agency, which in turn leads to household food security and  
25 improvements in the quality and quantity of food that is available for children to eat.  
26 Second, that important non-food inputs are also necessary to make cash work for child  
27 nutrition and wellbeing, in particular, women’s time, women’s knowledge about  
28 appropriate feeding, feeding and care practices, the availability and use of health and  
29 nutrition services, and education services.  
30  
31  
32  
33  
34  
35  
36  
37  
38

39 In the considerable body of work that exists on the role and effectiveness of the CSG in  
40 improving child outcomes, there are only a few qualitative studies that explore how it works  
41 in relation to other inputs necessary for child wellbeing and nutrition. There remains a gap  
42 in understanding how and what it takes to achieve wellbeing for CSG beneficiaries growing  
43 up in poor households in South Africa. This paper attempts to address this gap. With this  
44 framework as a reference point, we present findings from a qualitative study conducted to  
45 explore the role of the CSG in food security and child wellbeing in poor households in an  
46 urban and a rural setting in South Africa. Through these findings our paper interrogates how  
47 caregivers at a micro-level utilise the CSG and explores what is necessary to support child  
48 wellbeing in the context of the grant.  
49  
50  
51  
52  
53  
54  
55  
56  
57



## Methods

This qualitative study focused on an in-depth examination of the CSG and its role in child wellbeing and food security in an urban township in Langa, Western Cape Province and in a rural setting in Mt Frere, Eastern Cape Province.

### Sampling frame

The sample of caregivers included in this study was drawn from households which participated in a longitudinal cohort study focusing on non-communicable diseases called the PURE Cohort. While the CSG is available for both female and male primary caregivers to access on behalf of eligible children, the majority of claimants (more than 95%) are women. Thus in this study all the participants were women. The study sample comprised a total of 40 in-depth interviews (20 in each site) with mothers or primary caregivers in receipt of the CSG for children under the age of 5 years. In addition, 5 focus group discussions with approximately 8 members per group were conducted. The focus group discussions were conducted to gather a community level perspective on the role of the CSG in children's diets and food security, and how women were securing food for their children

We chose to focus on children younger than 5 years because of the evidence that the first 5 years of life are the most important for nutritional outcomes that impact on childhood and beyond.

In some households a family member was present during the individual interviews, in particular in a number of instances where we were talking with the biological mother of the index child, the grandmother would be present. In all instances we ensured that the participant was happy for us to continue with the interview in the presence of another individual. Often the family member would be called upon by the participant to corroborate or remind her of certain facts.

Table 1 presents a profile of the study participants in terms of average household size, CSG receipt status, employment, and education levels in each site. The age range of the participants interviewed was 18-70 years, with 6 of the interviews being conducted with grandmothers who were the primary caregivers of the children selected. Marital status differed by site with fewer married respondents from Langa than Mount Frere. In Mount

Frere none of the respondents was employed, while in Langa 3 participants were in formal employment. No respondent in any of the two sites had education levels beyond secondary school. In this manuscript only data and findings from recipients are presented.

### **Data collection and analysis**

The lead author along with the study co-investigators developed interview topic guides which were piloted in both Langa and Mt Frere and subsequently revised before being used to conduct individual and group interviews. In 2015 the lead author together with VR conducted all in-depth qualitative interviews and focus group discussions in the two sites. The interviews were conducted in isiXhosa as this was the main language spoken in both sites. When time and logistical circumstances permitted WZM and VR would have a discussion after each interview, comparing notes on the themes they felt were emerging. Interviews were conducted until data saturation was achieved.

All data were analyzed using Graneheim et al's[23] manifest and latent thematic content analysis methods<sup>3</sup>. Data were transcribed and translated into English and checked against the original recording to ensure accuracy by independent transcribers. Following each interview, field notes were written to capture the context, home environment and non-verbal communication<sup>4</sup>. These were analysed after each interview and used to guide further interviews where appropriate. The lead author read through each of the transcripts, noted initial thoughts, and began manifest coding of the data. A list of all interviews and transcripts was captured in Excel and manual copying and pasting of passages of text from Microsoft Word was undertaken during the categorisation of data. Although the lead author coded the data, there was extensive involvement of all authors in the analysis and interpretation of findings/results. Co-authors read the summaries of interviews and looked at some 'raw' transcripts to validate emerging themes and had several meetings, including two separate 2-day data analysis workshops to collectively undertake the analysis to ensure its reliability. Initial codes were grouped together into categories that were then further transformed into major themes. Transcripts were not returned to participants for comments. However, our ethics protocols encouraged interviewees to raise questions and

---

<sup>3</sup> A process where each transcript is first read through, then manually coded and repeated codes are categorised into themes

<sup>4</sup> Non-verbal communication such as quietly crying, sighs, eye-contact avoidance

1  
2  
3 interviewers were careful to reflect back and summarize comments throughout the  
4 interview to ensure accuracy of interpretation.  
5

### 6 7 **Patient and Public Involvement**

8  
9 The development of the research question was informed by previous research which  
10 showed that recipients of the CSG were experiencing similar levels of food insecurity[24]  
11 and declining child nutritional status. In conducting this research we sought to understand  
12 participants' experiences of securing food for their children in the context of the grant. The  
13 research question therefore speaks to participants' experiences and priorities as it relates to  
14 issues that directly affect the wellbeing of their children and households.  
15  
16  
17  
18

19  
20 Participants were not directly involved in the design of this study, however, previous  
21 research that we had conducted with similar communities on a related topic informed the  
22 study design[7, 25]. Patients were recruited for individual interviews and focus group  
23 discussions but they were not directly involved in recruitment.  
24  
25  
26

27  
28 Community meetings will be set up with participants in Langa to share study findings.  
29  
30  
31

### 32 33 **Ethics**

34  
35 This study received ethical approval from the South African Medical Research Council  
36 (EC036112105).  
37

38  
39 Before each interview, the interviewers explained the purpose of the interview in detail and  
40 as far as possible ensured that participants understood what agreeing to participate in the  
41 study meant. Participants who agreed to participate signed a consent form. All participants  
42 were each given grocery shopping vouchers worth R100 (US\$7.48) to compensate them for  
43 their time.  
44  
45  
46

### 47 48 **Results**

49  
50 Respondents were asked to describe in detail their decision-making about utilising the CSG,  
51 in particular, how they used it to meet children's needs and their experiences of accessing  
52 food in the context of receiving the grant. We have adapted Leroy et al's[22] framework  
53 (figure 2) to identify the main themes emanating from the data about the different  
54  
55  
56  
57

1  
2  
3 strategies caregivers engaged in to ensure food security and their children's wellbeing  
4 through utilisation of the CSG. Using the adapted framework, we start off by presenting  
5 results related to: 1) Women's income control and agency; followed by 2) Household Food  
6 Security; then 3) Education: attendance at early child development (ECD) centres; and then  
7 while keeping with the theme on education and ECD centres, we present findings on Food  
8 served at ECD centres (4) . Where possible we contrast findings from the rural site with  
9 those of the urban setting.  
10  
11  
12  
13  
14

### 15 **1. Women's income control and agency**

16  
17 Leroy et al's[22] framework conceptualises the placing of money in women's control as a  
18 form of empowerment which leads to the availability of income in the household which  
19 women generally use for the good of the entire household. In this study, many caregivers  
20 stated that they pooled the CSG with other sources of income in the household (including  
21 other grants) and spent it on the needs of the household, with children's needs being  
22 prioritised in many of the households. The bulk of the CSG went to needs related to direct  
23 food and school-related costs, though some was spent on household needs like utilities  
24 (electricity), toiletries and transport for job-seeking or health-care.  
25  
26  
27  
28  
29  
30  
31

32 *"... as I'm not working, sometimes I use the grant that my child gets to meet some of my*  
33 *needs like toiletries for myself and then I also use it for my child's needs as well. When I go*  
34 *looking for a job I use some of the grant and I also use it for my child's little things like lunch*  
35 *box things...because even the person I cohabit with is unemployed so I use that money... the*  
36 *grant... I buy electricity using the grant"* (CSG Recipient, Langa)  
37  
38  
39  
40  
41

42 Different motivations and priorities informed the specific decisions caregivers made about  
43 what food to buy and what to feed their children. Sometimes these decisions were based on  
44 something as simple as wanting to make their children happy, even if this meant buying  
45 foods that were not deemed healthy. In other instances it was the caregiver's support  
46 system that influenced what food the children ate. Often it was the presence of a  
47 grandmother in the household who either worked or received their own old age pension,  
48 which allowed children to have access to foods that they would otherwise not have.  
49  
50  
51  
52  
53

54 *And then I also buy chips... things that will make them happy; [such as] yoghurts.....I buy a*  
55 *bag...of fifty [chips a month]."* (CSG Recipient, Langa)  
56  
57  
58  
59  
60

1  
2  
3 *...on Mondays she doesn't usually have fruit because perhaps... there's usually none here at*  
4 *home. Then I know on Thursday there's no way there would not be [fruit]. On weekends she*  
5 *has plenty [of fruit] because it's always available on weekends. Because when my mother*  
6 *goes to work on Mondays, Wednesdays and Fridays, she brings back fruit for her. (CSG*  
7 *Recipient, Langa)*

8  
9  
10  
11  
12 *He likes eating yoghurt and she buys him Fritos chips, sometimes she also buys him Nik Naks,*  
13 *sometimes she buys him Kinderjoy (chocolate).... He eats them maybe 3 times a week*  
14 *because his grandmother buys them when she gets back from work (CSG Recipient, Langa)*

15  
16  
17  
18  
19  
20 Other times it was a combination of convenience, affordability and the perceived nutritious  
21 value of the food that influenced the choices caregivers made about what to feed their  
22 children.  
23

24  
25  
26 *"However, the best bet is to use Instant Porridge just like I do....like my child leaves very*  
27 *early [for daycare], so I don't have time to stand over the stove to cook very early in the*  
28 *morning whilst the transport is hooting outside, so Instant is very good for that.... I can also*  
29 *say morvite is far better than any other porridge, it has vitamins.....one has to be clever*  
30 *about what you feed the child, because things like meat are very expensive, we only eat it on*  
31 *Sundays....." (CSG Recipient, FGD2, Langa)*

32  
33  
34  
35  
36  
37 *Yes I've been feeding him anything that I think is good for him, like if it's something like veg*  
38 *then I knew that I must grind it and then he will eat it (CSG Recipient, Mt Frere)*

39  
40  
41 Respondents complained that the CSG by itself was 'too small' to feed their children and  
42 meet their other many needs within households with many competing demands on money.

43  
44  
45 *They get money for clothing from this [CSG] money, on the other hand there is debt for food,*  
46 *then its school stuff, you see, others let's say they go to school here in the location, others*  
47 *they use transport, all from the same money, [and even if there is] maybe another source of*  
48 *income, let's say money from being a domestic worker, maybe they work a few days maybe*  
49 *two, and you find that it is not only this caregiver in the household, maybe there are four*  
50 *people here at the house and children, but this money is too little to be enough for here in*  
51  
52  
53  
54  
55  
56  
57  
58  
59  
60

1  
2  
3 *the house you see, so its like that, then you are forced to make debt (CSG Recipient, FGD3,*  
4 *Langa)*

5  
6  
7 Respondents specifically identified food as the main reason for taking out loans.

8  
9 *It is mostly debt for food...because there is that bread that they must have every day you*  
10 *have to buy it you see, no matter what bread has to be bought every day, even if there will*  
11 *be food there has to also be bread, even things to spread on the bread for the children, and*  
12 *porridges for the children everyday they have to have them, besides thinking "heee what is*  
13 *going to be eaten?" first thing when they wake up in the morning, there must be something*  
14 *to eat in the morning (CSG Recipient, FGD3, Langa)*

15  
16  
17  
18  
19  
20  
21  
22  
23 Some respondents felt that there was an expectation from family and community members  
24 for the grant to be able to meet all of the needs of their children. One mother who had two  
25 children and was pregnant with another and lived with her parents and older siblings talked  
26 about the pressure of needing to stockpile baby formula and other essentials in preparation  
27 for the unborn baby, in addition to meeting the needs of her existing children, so that she  
28 would not have to ask for help from her family whom she felt judged her spending of the  
29 grant:  
30  
31  
32  
33

34  
35 *I am trying to save all the time and I have to buy milk and put it aside, then I buy bottles and*  
36 *put them aside, because if I ask one of my family members to please buy me milk, then they*  
37 *will ask me if I do not get the grant for the children and what I do with the money, and yet*  
38 *the money that we get from grant does not do everything. Yes it does help out but it does*  
39 *not buy everything, then they will ask where the father of these children is and I know that*  
40 *the father needs work.*

41  
42  
43  
44  
45  
46 Despite the small value of the CSG, many caregivers acknowledged that it allowed them to  
47 have greater leverage both for accessing credit systems and informal reciprocal networks. In  
48 this way while the small value of the grant undermined women's agency on the one hand,  
49 on the other its very presence enabled women to leverage it to access and maximise their  
50 social capital. Access to credit systems and informal reciprocal networks enabled recipients  
51 to use the grant in a flexible manner. Sometimes this took the form of accessing food on  
52  
53  
54  
55  
56  
57

1  
2  
3 credit at informal outlets (spaza shops) when they ran out of food halfway through the  
4 month:  
5

6  
7 *" [at the Somalians<sup>5</sup>] ... when I run out I can go back to them and ask for them to give me a*  
8 *2kg or a 1kg....on credit of course. When I get paid I pay them back....[I]pay for all the things*  
9 *I've taken during the month. I take the R350 hamper, when it is finished I go again.....they*  
10 *also know that on the 1<sup>st</sup>, M\*\*\* will pay them"* (CSG recipient, Langa)  
11  
12  
13

14 Similarly, the CSG allowed caregivers to borrow from their neighbours in times of need,  
15 knowing that they would be able to repay them with the next grant pay out. In both the  
16 rural and urban study sites borrowing could be in the form of cash or food, or swapping  
17 food items. In all instances, including borrowing from a neighbour and relatives, mothers  
18 emphasised that whatever was borrowed had to be repaid at the beginning of the new  
19 month when people received their grants:  
20  
21  
22  
23

24  
25 *"We ask around in the village, maybe someone you know, like a neighbour. You say "Can*  
26 *you please give me some maize meal", you know that you are going to mix that with*  
27 *whatever you have in the house, maybe next time she will also need the same from you...we*  
28 *swap items -maybe you have mealie-meal or potatoes and maybe that is just what she*  
29 *needs"*(CSG recipient, Mt Frere)  
30  
31  
32  
33

34  
35 *"...[if you borrow] yes you must reimburse them. Even when you buy [your own] 12,5 kg (of*  
36 *mealie-meal) you have to pay the person back for their mealie meal...yes, indeed no one*  
37 *works for anybody else..... That is compulsory. Even now, I had borrowed some mealie meal*  
38 *from someone, I returned it in the morning"* (CSG Recipient, Mt Frere)  
39  
40  
41

42 In summary, in this study, true to the framework, access to the CSG seemed to increase  
43 women's income control and agency. However, teasing out the particular ways in which this  
44 small cash transfer, often introduced in contexts of dire poverty and deprivation, linked to  
45 women's agency proved complex and messy. The extent to which women's income control  
46 of the grant translated to agency and influenced decision making around food was mediated  
47 -and sometimes limited -by a number of factors including: caregivers' relationships and  
48 social networks, caregivers' perceptions of what their children needed, the value of the  
49 grant, and coping strategies.  
50  
51  
52  
53  
54  
55

56  
57 <sup>5</sup> The term "Somalians" refers to spaza shop owners who are Somalian foreign nationals  
58

## 2. Household Food Security

Mothers of CSG recipients provided detailed information about their spending of the CSG on food. Most primary caregivers in the study detailed feeding patterns that showed diets that were mostly starchy and sugary, with very little protein, vegetables, fruit and dairy. Mothers explained this as being a result of not having enough money.

*“They [children] eat whatever is in front of them. Porridge, rice, potatoes as well. Milk no, they only get it when I have money, then I’ll buy them then...right now they drink Rooibos [tea]” (CSG recipient, Langa)*

*“I don’t buy meat regularly.. I buy it on the day we get the grant or sometimes after weeks, I mean it is not something common that we eat meat....” (CSG recipient, Mt Frere)*

Some food items, like sugar, though unhealthy, were regarded as highly valuable, as they made basic (typically plain) food, such as maize meal (pap) or soft porridge, palatable. The importance of sugar came out particularly strongly in the rural site.

*“.....you must always have some sugar, we need to have sugar because when there is nothing else you can always just make pap and tea and the kids could just eat that and go to bed, they do not have a problem” (CSG recipient, Mt Frere)*

Households experienced regular food shortages and food often ran out before the end of the month. Caregivers demonstrated resilience and resourcefulness when they ran out of food, and would often have to go to extraordinary lengths to obtain food for their children. Sometimes this meant leaving very young children in the care of their siblings to walk for miles to get food from relatives.

*“What I usually do when there is no food is to wash and leave this [15 month old] child with the younger children and then I walk to eNcinteni... I go to my sisters in-law -my husband’s brothers’ wives and come back with things I can cook for the kids, like potatoes, then I make the fire outside in the three-legged pot and I cook for my children and they go to bed having eaten” (CSG recipient, Mt Frere)*

Extreme levels of food insecurity in some households led caregivers to significantly change their diets; to sacrifice their share of meals and to dilute food in order to make it go further



1  
2  
3 and spread it among more children in the household. Baked food items and using products  
4 from farmed animals were other common strategies, in the rural site.  
5

6  
7 *“when there is no money we often go to bed on pap and tea. We go to bed like that...when I*  
8 *was working we would have pap and meat and potatoes, we had good zishebo<sup>6</sup>. Now it is*  
9 *difficult for us, we eat whatever is available...then sometimes I make homemade bread and*  
10 *we eat that with tea, ... –we do all of this to make sure that we do not run out of food*  
11 *quickly.....we must make sure that the food only runs out when it’s close to month end” (CSG*  
12 *recipient, Mt Frere)*  
13

14  
15  
16  
17  
18 *“I sometimes try the [Maas] that’s sold [in shops], but I myself cannot eat it, even though it’s*  
19 *my favourite. I cannot eat it because, even [my youngest] and the others eat it. You realise*  
20 *that if you buy a 2 litre or a 5 litre [Maas], I think: “If I make pap and maas for myself as well,*  
21 *this maas will get finished quickly.... but it’s supposed to last a few days [at least].” [So]*  
22 *perhaps I take...I take some spinach and cook that [for myself] ... or I make sugar water, and*  
23 *I sleep having eaten” (CSG Recipient, Mt Frere)*  
24  
25  
26  
27

28  
29 For children under 2 years old who were still thought to need formula milk, periods of food  
30 insecurity meant cutting out formula milk altogether, diluting it, reducing the frequency of  
31 bottle feeding or supplementing with cheap dairy products such as Maas (sour milk), a  
32 popular meal in Black African households.  
33  
34  
35

36  
37 *“[In her case A\*\*] stopped having baby formula prematurely, because there was no*  
38 *money...the formula would get finished, you would see that [the formula]..that thickness is*  
39 *going down. While the child would be growing and needing more of it, it would be going*  
40 *down. So she would be eating formula which is more watery....So I got her used to my*  
41 *making sorghum porridge for her....Then I would take the baby formula, make it and pour it*  
42 *in here [with the porridge] so that she can eat something with milk in it.” (CSG recipient, Mt*  
43 *Frere)*  
44  
45  
46  
47

48  
49 *“... since he’s older now, it [formula] lasts two weeks... Now, I normally feed him that in the*  
50 *morning... and then again in the evening; ... During the day... I may give him even a lump of*  
51 *pap. Now I even buy Maas for him, I even buy Maas for him and then mix it with pap for him*  
52  
53  
54  
55

56  
57 <sup>6</sup> Relish used to accompany a starch dish

1  
2  
3 *in the evening..... [the formula] lasts... three weeks because I would carefully plan its use."*

4 *(CSG Recipient, Langa)*  
5  
6  
7  
8

9 A number of respondents shared stories of extreme hardship as they negotiated their day to  
10 day lives and tried to provide food for their children with cash transfers as the only source of  
11 income in households where adults were either all unemployed or had precarious  
12 intermittent work. Caregivers shared stories about how they 'made a plan', in very dire  
13 circumstances, to ensure that their children had food and other needs met.  
14  
15

16  
17  
18 *"You know when you're a woman, you make a plan. Mmm, to be a woman is to make a*  
19 *plan"(CSG recipient, Mt Frere)*  
20  
21

22 *"...when you milk the goats; if you're going to feed [the milk] to her – before the milk curdles*  
23 *– you filter it...you cook it until it boils, then you put it into a flask. It's very nourishing. You*  
24 *then take it and feed your infant. I mix it and mix it... so that the infant can finish that pap-*  
25 *like thing. And when her stomach is semi-full, I then take the baby bottle **and feed [her],***  
26 *then she sleeps..." (CSG recipient, Mt Frere)*  
27  
28  
29  
30  
31

32 In the few households where the CSG was not the sole source of income, particularly in  
33 households where either the caregiver worked or another close member of the household  
34 was employed, the child's diet was markedly different, with more variation and choice.  
35 Notably, in both instances where this was the case the respondents were from the urban  
36 site, Langa.  
37  
38  
39

40  
41 *She wakes up and eats porridge. Like... she prefers Kellogg's; the one that's*  
42 *porridge...Sometimes, though, it might be Weetbix. Or it might be... this thing... what's that*  
43 *thing? That thing that's like tasty wheat, but it's also like...it's similar to oats, but it's also*  
44 *instant [porridge]. Those are the things that she prefers, which I make for her in the*  
45 *morning....[with] her milk...Nido; the 3 years+...(CSG Recipient, Langa)I buy sugar..., 5 kg..., I*  
46 *buy rice..., 5 kg..., I buy mielie meal, 5 kg..., I buy Milo®; because they love Milo®.....So... in*  
47 *the morning they eat porridge and milk. I buy the milk in those 6 packs. It lasts half a*  
48 *month..... and meat...: mince meat, burger [patties], chicken, [and] viennas for sandwiches*  
49 *for when they go to school. And cheese..., and tomatoes, and... fruit. All types of fruit: apples,*  
50  
51  
52  
53  
54  
55  
56  
57  
58  
59  
60

1  
2  
3 *bananas, nectarines... I also buy potatoes of course. And onions and tomatoes for cooking.*  
4 *And spices. (CSG Recipient, Langa)*  
5  
6  
7  
8

9 In summary, while the CSG was an important source of income, enabling caregivers to  
10 secure food for their children, it did not prevent food insecurity nor did it enable diverse,  
11 nutritionally adequate diets: households experienced regular food shortages, and when  
12 there was food, the diets were often not nutritionally complete. During periods of shortage  
13 women engaged in different coping strategies to make food last longer. In households  
14 where the CSG was not the only source of income, diets were more varied.  
15  
16  
17  
18  
19  
20  
21  
22  
23  
24

### 25 **3. Education: attendance at ECD centres**

26  
27 In Leroy et al's[22] framework education is one of the key interventions needed to improve  
28 child nutrition and wellbeing. About 90% of the primary caregivers we interviewed had their  
29 children attending ECD centres, commonly referred to as crèches. Costs ranged from R50 to  
30 R300 a month, though the majority of children in this study attended centres charging at the  
31 lower end of this range. Some of the centres were registered while others were informal,  
32 but it was difficult to differentiate between them as primary caregivers themselves did not  
33 typically have this information. All the centres served food, with most children either  
34 receiving breakfast and lunch, or lunch only. A significant proportion of the CSG went  
35 towards crèche-related costs. In addition to direct fees this included, transport, lunchboxes  
36 and snacks, school bags, and in the case of Mt Frere, chairs to sit on.  
37  
38  
39  
40  
41  
42  
43  
44

45 *"Like... this one's [child support grant], I don't even touch it; it goes to the crèche. I pay for*  
46 *her crèche [with the money]. It's R230, yes, plus ... they must also pay for snacks."* (CSG  
47 *Recipient, Langa)*  
48  
49

50  
51 *"[Crèche] is R180 [per month] this year, I don't know next year if it will still be the*  
52 *same....and then money for transport is R140 [per month]."* (CSG Recipient, Langa)  
53  
54  
55  
56  
57  
58  
59  
60

Caregivers went to great lengths to obtain relatively expensive food items such as juice (concentrate), fat spread, eggs, and snacks for their children to carry to school. This was the case even in the crèches that served food –caregivers still felt the need to send their children to school with a special packed lunch.

*“[the CSG] makes a difference. A small difference...but it makes one because, as I say to you, ...in the morning when they go to school I give them an egg... and chips, and bread, a slice of bread...”(CSG Recipient, Mt Frere)*

*“Then you have to try to get some juice, you have to try to get some Rama [margarine]... if you don’t have eggs. [But] not the real Rama™, these lesser Rama’s... you then spread, and spread, and spread [the Rama to make it go further], you put in the juice and the child leaves.” (CSG Recipient, Mt Frere)*

In summary, attendance at ECDs was common among the children enrolled in the study and the costs associated therewith were high, often exceeding the value of the CSG.

#### **4. Food served at ECD centres**

Even though all the crèches served food –as much as 2 meals a day in many centres -it was difficult to ascertain exactly what was served at the crèches. Many respondents could mention one or two items of food or meals that they thought their children were eating but had no detailed information of the food served for breakfast and lunch in a five day week.

*“I don’t know what mine is fed, I can’t lie, my child at one stage was fed Saldahna [tinned fish]...”(CSG Recipient, FGD4)*

*“There is usually breakfast...porridge... they said it is porridge....Or otherwise, there is also a Morvite<sup>7</sup> day. I’m not sure [what else] now.” (CSG Recipient, Langa)*

Some caregivers felt that the food served at crèches was not enough, and that this was the reason they felt it necessary to send their children with additional food, and why they had to have something ready for them to eat in the afternoon after crèche. It was not possible to accurately measure this since many respondents were not clear about what was served

---

<sup>7</sup> Sorghum sweetened instant porridge

1  
2  
3 at creches or the portion sizes. Some caregivers did however observe that their children  
4 often came back from crèche thirsty and hungry.  
5

6  
7 *“They get food from the school...No, it’s not enough of course. These are people who, as*  
8 *they come in, because they’re children, they say: “We’re thirsty, may we please have juice.*  
9 *We’re hungry... and so on” (CSG recipient, Mt Frere)*  
10

11  
12 *[they are served] rice, Saldahna (tinned fish), but it’s always a mixture of the two, sometimes*  
13 *its Soya, but where my child is schooling there are tinned Saldahna that are packed to the*  
14 *rafters, so I assumed that only a mixture of this Saldahna and rice is prepared and given to*  
15 *children (P2, CSG FGD2, Langa)*  
16  
17

18  
19  
20 *I felt that at school the food is not good at all. Some people preparing food at these creches*  
21 *aren’t trained at all and they aren’t careful with what they supply children at school with.*  
22 *My child doesn’t eat at school anymore she carries her food from home (P3, CSG FGD2,*  
23 *Langa)*  
24  
25  
26

27  
28 In summary, all the ECDs served meals, however caregivers were not clear about what they  
29 were served, nor were they satisfied that their children were receiving enough food at the  
30 crèches.  
31  
32  
33  
34  
35  
36  
37  
38  
39  
40

## 41 **Discussion**

42  
43 This study contributes to the current relatively small evidence base of qualitative studies  
44 that seek to understand how cash transfers in low and middle income settings play a role in  
45 child nutrition and wellbeing. Since this is a qualitative inquiry, findings cannot be  
46 generalised outside the study sites where the research was conducted. However, inferences  
47 can be drawn to broaden our understanding of how cash transfers affect child nutrition and  
48 wellbeing in low and middle income settings.  
49  
50  
51  
52

53  
54 Despite the original focus of the CSG on providing nutrition support to children in poor  
55 households, it is well known from literature that it takes many different inputs in addition to  
56  
57

1  
2  
3 food to achieve good nutrition and general child wellbeing. Findings from this paper show  
4 how the various needs that children and households have, affect the strategies used and  
5 trade-offs made by caregivers in the utilisation of CSG.  
6  
7

8  
9 Our results support evidence reported by others which demonstrate that while the CSG is  
10 an important nutrition-sensitive intervention, malnutrition is complex, and requires a  
11 coordinated package of nutrition specific and nutrition sensitive interventions[7]. Moreover,  
12 on its own, the CSG is clearly a small amount of money and therefore, irrespective of the  
13 multiple uses it is put to, has limited ability to provide even adequate quality nutritious food  
14 for a child. In the context of rising food prices as observed in 2016, even if the CSG was  
15 spent exclusively on nutritious food for beneficiaries alone, at its 2016 value (R350) it would  
16 “cover less than two-thirds of the minimum food needs of a young child (63%) or an older  
17 child (58%)”[7]. The Pietermaritzburg Agency for Community Social Action (PACSA) Food  
18 Price Barometer for September 2016 calculated that the cost of a basic but nutritious food  
19 basket for a young child was R537.48 per month, way above the R350 value of the CSG at  
20 the time[26]. The CSG is not only small, it is also diluted among “multiple users and multiple  
21 uses”[7, 18] as shown in this study. It can be argued that in a context of widespread poverty  
22 and high unemployment rates, it is impractical and unethical to expect caregivers to ring-  
23 fence expenditure of the CSG on child beneficiaries only.  
24  
25  
26  
27  
28  
29  
30  
31  
32  
33  
34

35 The findings from this study confirmed Leroy et al’s framework[22], that increasing women’s  
36 income control facilitated attempts to mitigate food insecurity. Giving cash to women gave  
37 them control over a portion of the household income that only they had a say in how it  
38 should be spent. As reported in other studies[25, 27] placing the CSG in the hands of women  
39 allowed them to leverage it to access reciprocal networks in the form of neighbours,  
40 relatives and access to informal credit when food ran out. The findings from this study  
41 indicate that these systems of reciprocity were intricate and elaborate mechanisms and  
42 were crucial life lines for communities with few other margins. At every turn caregivers  
43 struggled: with food insecurity, where children had poor diets and mothers had to employ  
44 different strategies to ensure that there was food; in care practices, where the inadequacy  
45 of the grant made basics like soap a precious commodity; in accessing ECD services, where  
46 costs included fees, transport, lunchboxes and even in some cases, furniture and  
47 equipment.  
48  
49  
50  
51  
52  
53  
54  
55  
56  
57  
58  
59  
60

1  
2  
3 Interventions such as ECD centres in South Africa hold a lot of promise in helping to meet  
4 the food needs of children from poor households. Ruel et al[6] emphasise the importance  
5 of ECD interventions with or without a nutrition component in tackling malnutrition. In  
6 South Africa the ECD programme has a nutrition component, and as shown in this study it  
7 potentially makes up a significant amount of a child's daily food intake. However, it is not  
8 well researched in terms of dietary quality and adequacy. Significantly however, though  
9 mothers prioritised early childhood education, it is important to note that it is not free. As  
10 indicated, the direct and indirect costs associated with attendance at ECD centres, took up  
11 the whole grant in some households.  
12  
13  
14  
15  
16  
17  
18

19 Taken together, our findings show that in the context of a non-comprehensive social  
20 security system caregivers constantly made trade-offs to meet essential needs –food vs  
21 education vs care practices. There was no evidence of misuse. Instead, in the context of  
22 fundamental, pressing and competing needs, rational decisions were made about how to  
23 spend this small cash transfer. Evidence from studies that have interrogated the relationship  
24 between the CSG and misuse and perverse incentives refutes such claims[28-30].  
25  
26  
27  
28  
29

30 In their working paper on food security and social grants published in 2017, Devereux and  
31 Waidler[7] point out that while social grants in South Africa are an important source of  
32 income for poor households, the amounts they transfer to households need to rise and  
33 should be linked to the amount of money needed to buy a nutritious food basket. The  
34 authors further recommend that social protection provision should be framed within “cash  
35 plus” models that are linked to broader non-cash services and inputs such as health,  
36 education, social services and sanitation and the promotion of appropriate nutrition and  
37 hygiene practices. Current interest in “cash plus” models arises out of the growing  
38 recognition that it takes more than cash or a narrow focus on food to improve child  
39 wellbeing[31]. In South Africa “plus” components such as free education or subsidised ECD  
40 services are in place, but as this paper has shown, access is often inequitable and still comes  
41 with hidden costs.  
42  
43  
44  
45  
46  
47  
48  
49  
50  
51  
52

## 53 **Conclusion**

54  
55  
56  
57  
58  
59  
60

1  
2  
3 This study has demonstrated that caregivers make rational decisions and employ different  
4 strategies that ultimately serve –even if in a small, limited way -the actual goals of the CSG:  
5 child wellbeing and nutrition. The recent public furore around threats to the disbursements  
6 of social grants in South Africa was proof once again of how indispensable cash transfers  
7 such as the CSG have become to the survival of households in South Africa. It is indisputable  
8 that the CSG plays an important role in childhood poverty alleviation efforts in South Africa.  
9 However it is not a panacea. This paper has presented results which confirm previous  
10 findings about the inadequacy of the CSG to meet its goal of providing support for nutrition.  
11 However, in a context of high unemployment rates, soaring food prices, rising cost of living  
12 and the lack of coordination between other nutrition-sensitive and nutrition-specific  
13 interventions, their efforts were undermined by a cash transfer that was too small in value  
14 to make a meaningful difference to child nutrition. Thus, while the CSG is important, much  
15 more emphasis should be placed on parallel structural solutions that are important in  
16 ensuring good nutrition outcomes and wellbeing. These would include access to free, quality  
17 ECD services that provide adequate nutritious meals, access to basic services that impact on  
18 nutritional outcomes such as housing with adequate water and sanitation services, and the  
19 promotion of appropriate feeding, hygiene and care practices. Such measures would form  
20 part of a coordinated response to improve child wellbeing, consisting of a package of  
21 nutrition sensitive and nutrition specific interventions, in addition to raising the value of the  
22 CSG, and creating a comprehensive social security system in South Africa that provides for  
23 people through the life course.  
24  
25  
26  
27  
28  
29  
30  
31  
32  
33  
34  
35  
36  
37  
38

39  
40 Further research, both qualitative and quantitative, is needed to understand how nutrition-  
41 sensitive non-food inputs such as ECD services and care arrangements work to impact on  
42 child nutrition and wellbeing within a “cash plus” framework.  
43  
44  
45  
46  
47  
48  
49  
50  
51  
52  
53  
54  
55  
56  
57  
58  
59  
60



## References

1. Hendriks, S., *Food security in South Africa: Status quo and policy imperatives*. Agrekon, (2014). **53**((2)): p. 1-24.
2. Ruel, M., Hoddinott, J., *Investing in early childhood nutrition*. 2008, IFPRI: Washington DC.
3. Case, A., Paxson, C., , *Causes and Consequences of Early Life Health*, in *NBER Working Paper Series no. 15637.*, M.N.B.o.E.R. Cambridge, Editor. 2010.
4. May, J., and Timæus, I.,, *Inequities in under-five nutritional status in South Africa: what progress has been made?* Development Southern Africa 2014. **31**((6)): p. 761-774.
5. Children, S.t., *Unequal portions - ending malnutrition for every last child*, S.t. Children, Editor. (2016), Save the Children Fund: London
6. Ruel, M., Alderman, H. , *Nutrition-sensitive interventions and programmes: how can they help to accelerate progress in improving maternal and child nutrition?* Lancet 2013. **382**: p. 536-51.
7. Devereux, S., Waidler, J. , "Why does malnutrition persist in South Africa despite social grants?" in *Food Security SA Working Paper Series No.001.* , D.-N.C.o.E.i.F. Security, Editor. (2017): South Africa.
8. May, J., *Why child malnutrition is still a problem in South Africa 22 years into democracy*, in *Health and Medicine*, C. Bailey, Editor. 2016, The Conversation: South Africa.
9. Hall, K., Sambu, W., Berry L., Giese, S., Almeleh, and S. C. and Rosa, *South African Early Childhood Review 2016*. South African Early Childhood Review 2016, ed. A. Delany, Jehoma, S., Lake, L (eds.). (2016), Cape Town: Children's Institute, University of Cape Town and Ilifa Labantwana.
10. StatsSA, *South Africa Demographic Health Survey 2016: Key Indicators Report 2017*, Statistics South Africa Pretoria.
11. Bastagali, F., et al., *Cash transfers: what does the evidence say? A rigorous review of programme impact and of the role of design and implementation features*. 2016, Overseas Development Institute: London.
12. Manley, J., S. Gitter, and V. Slavchøvska, *How effective are cash transfer programmes at improving nutritional status: A rapid assessment of programmes' effects on anthropometric outcomes*. 2012, EPPI-Centre, Social Science Research Unit, Institute of Education, University of London: London.
13. Lund, F., *Changing Social Policy*. 2007, Cape Town: HSRC Press.
14. Aguero, J.M., M.R. Carter, and I. Woolard, *The Impact of Unconditional Cash Transfers on Nutrition: the South African Child Support Grant*. 2006., Centre for Global Development: <http://www.cgdev.org/doc/events/11.07.06/unconditional%20cash%20transfers.pdf>.
15. Samson, M., Lee, U., Ndlebe, A., Mac Quene, K., van Niekerk, I., Gandhi, V., Harigaya, T., Abrahams, C., *The Social and Economic Impact of South Africa's Social Security System*. 2004, Commissioned by the Directorate: Finance and Economics, Department of Social Development: Pretoria.
16. Pienaar P.L. & Von Fintel D.P, *Hunger in the former apartheid homelands: Determinants of converging food security 100 years after the 1913 Land Act.*, in *Stellenbosch Economic Working Papers 26/2013*, U.o. Stellenbosch, Editor. 2013: Cape Town.
17. Battersby, J., *The State of Urban Food Insecurity in Cape Town.*, in *Urban Food Security Series* (2011), Queen's University and AFSUN: Kingston and Cape Town.
18. Coetzee, M., *Finding the Benefits: Estimating the Impact of the South African Child Support Grant.* South African Journal of Economics, (2013). **81**((3)): p. 427-450.

19. Mpike, M., Wright, G., Rohrs, S., Mohamed, Z., Mzankomo, L. , *Common concerns and misconceptions: what does the evidence say?*, in *South African Child Gauge 2016*, A. Delany, Jehoma, S., Lake, L (eds.), Editor. 2016, University of Cape Town: Cape Town. p. 55-59.
20. Fraser, N., Gordon, L. , *A Genealogy of Dependency: Tracing a Keyword of the U.S Welfare State*. The University of Chicago Press. , (1994) **Vol. 19**(No. 2): p. pp 309-336.
21. Mead L., *The New Politics of Poverty: The Non-working Poor in America*. (1992), US: Basic Books.
22. Leroy, J., M. Ruel, and E. Verhofstadt, *The impact of conditional cash transfer programmes on child nutrition: a review of evidence using a programme theory framework*. Journal of Development Effectiveness, 2009. **1**(2): p. 103-129.
23. Graneheim, U., Lundman, B. , *Qualitative content analysis in nursing research: concepts, procedures and measures to achieve trustworthiness*. Nurse Education Today, 2004. **24**: p. 105-112
24. Patel, L., et al., *The gender dynamics and impact of the Child Support Grant in Doornknop, Soweto*, in *Research Report, Centre for Social Development in Africa*. (2012) University of Johannesburg: Johannesburg.
25. Zembe-Mkabile, W., Surender, R., Sanders, D., Jackson, D., Doherty, T.,, *The experience of cash transfers in alleviating childhood poverty in South Africa: mothers' experiences of the Child Support Grant*. Glob Public Health, 2015. **10**(7): p. 834-51.
26. Smith, J., Abrahams, M., , *2016 PACSA Food Price Barometer Annual Report 2016*, Pietermaritzburg Agency for Community Social Action: Pietermaritzburg.
27. du Toit, A., Neves, D. , *Informal Social Protection in Post-Apartheid Migrant Networks: Vulnerability, Social Networks and Reciprocal Exchange in the Eastern and Western Cape, South Africa*. 2009, Brooks World Poverty Institute. [www.manchester.ac.uk/bwpi](http://www.manchester.ac.uk/bwpi).
28. Makiwane, M., Udjo, E., *No proof of 'child farming' in awarding of child support grants*. . Human Science Research Council Review, 2007. **5**(1): p. pp.6-7.
29. Makiwane, M., *The Child Support Grant and Teenage Childbearing in South Africa*. Development Southern Africa, 2010. **27**(2): p. 193 - 204.
30. Surender, R., Noble, M., Wright, G., Ntshongwana, P. , *Social Assistance and Dependency in South Africa: An Analysis of Attitudes to Paid Work and Social Grants*. Journal of Social Policy, 2010. **39**(2): p. 203-221.
31. Roelen, K., Delap, E., Jones, C., Karki Chettri, H., *Improving child wellbeing and care in Sub-Saharan Africa: The role of social protection*. Children and Youth Services Review, 2017. **73**: p. 309-318.

1  
2  
3  
4  
5 **Figure 1: Mechanisms by which cash transfer programs might affect child nutrition.**

6 **Source: Leroy, J., Ruel, M., Verhofstadt, E., 2009. The impact of conditional cash transfer**  
7 **programmes on child nutrition: a review of evidence using a programme theory**  
8 **framework. J. Dev. Eff. 1, 103–129.**  
9  
10  
11  
12  
13  
14  
15  
16

17 **Figure 2: Adapted conceptual framework for study findings**  
18  
19  
20  
21  
22  
23  
24  
25  
26  
27  
28  
29  
30  
31  
32  
33  
34  
35  
36  
37  
38  
39  
40  
41  
42  
43  
44  
45  
46  
47  
48  
49  
50  
51  
52  
53  
54  
55  
56  
57  
58  
59  
60

**Table 1: Profile of participants included in individual interviews (n=40)**

|                                                           | <b>Mount Frere<br/>(n=20)</b>              | <b>Langa (n=20)</b>                  |
|-----------------------------------------------------------|--------------------------------------------|--------------------------------------|
| <b>Household size range</b>                               | <b>2-6</b>                                 | <b>2-14</b>                          |
| <b>Average household size</b>                             | <b>4.3</b>                                 | <b>5.6</b>                           |
| <b>Age range of caregivers</b>                            | <b>18-70</b>                               | <b>18-65</b>                         |
| <b>Number of CSGs per household (range)</b>               | <b>1-5</b>                                 | <b>1-7</b>                           |
| <b>CSG caregivers in formal employment</b>                | <b>0</b>                                   | <b>3</b>                             |
| <b>Caregivers who have not completed secondary school</b> | <b>17</b>                                  | <b>6</b>                             |
| <b>Caregivers who have completed secondary school</b>     | <b>3</b>                                   | <b>14</b>                            |
| <b>Relationship of caregiver to child</b>                 | <b>Mother (n=13)<br/>Grandmother (n=7)</b> | <b>Mother (n=18)<br/>Grandmother</b> |

|  |  |              |
|--|--|--------------|
|  |  | <b>(n=2)</b> |
|--|--|--------------|

For peer review only

1  
2  
3  
4  
5  
6  
7  
8  
9  
10  
11  
12  
13  
14  
15  
16  
17  
18  
19  
20  
21  
22  
23  
24  
25  
26  
27  
28  
29  
30  
31  
32  
33  
34  
35  
36  
37  
38  
39  
40  
41  
42  
43  
44  
45  
46  
47  
48  
49  
50  
51  
52  
53  
54  
55  
56  
57  
58  
59  
60

For peer review only



A framework for the different inputs needed to make child cash transfers effective in improving child wellbeing and nutrition

82x57mm (300 x 300 DPI)

1  
2  
3  
4  
5  
6  
7  
8  
9  
10  
11  
12  
13  
14  
15  
16  
17  
18  
19  
20  
21  
22  
23  
24  
25  
26  
27  
28  
29  
30  
31  
32  
33  
34  
35  
36  
37  
38  
39  
40  
41  
42  
43  
44  
45  
46  
47  
48  
49  
50  
51  
52  
53  
54  
55  
56  
57  
58  
59  
60

Figure 2: Adapted conceptual framework for study findings

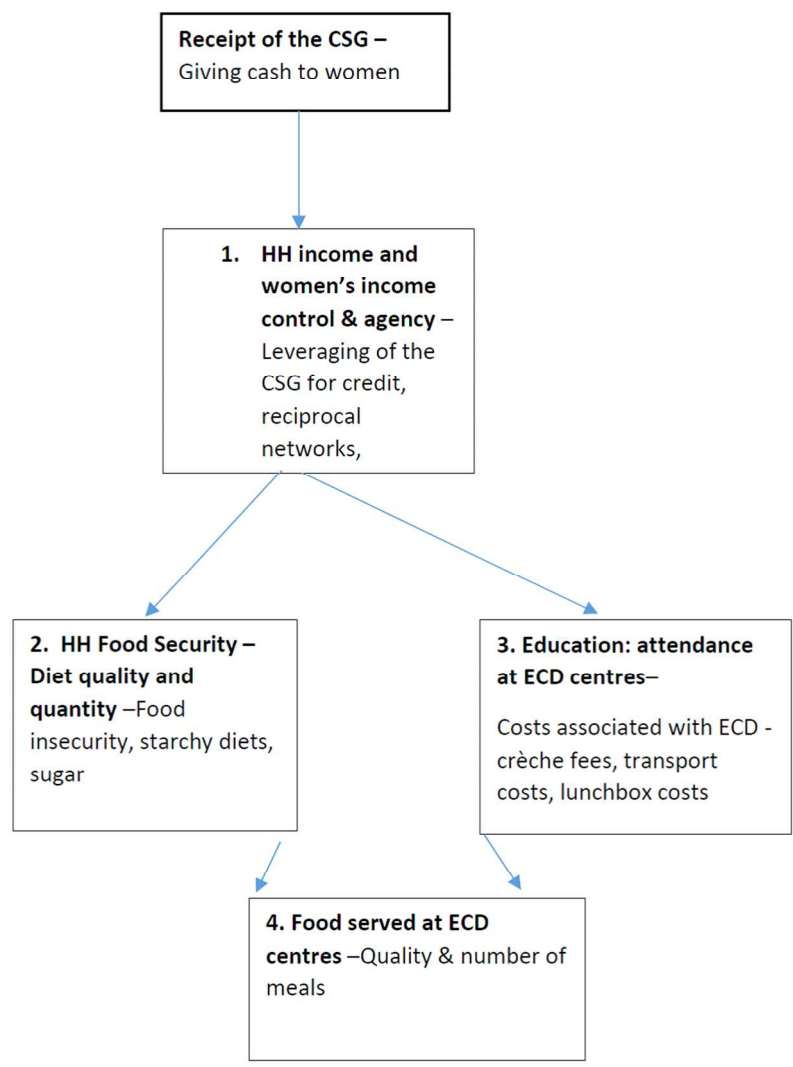

Adapted conceptual framework for the study findings

102x121mm (300 x 300 DPI)
